# Supplementary material
Source: publisher figshare collection journal article supplement (https://tandf.figshare.com/ndownloader/files/33660559)
Supplement: Supplementary file 1 [file 33660559]

Easting	Northing	census_block	census_tract	census_blockgroup
316668.417827298	4311722.8247191	110010009022016	902	110010009022
316668.417827298	4311772.92134831	110010009022004	902	110010009022
316668.417827298	4311823.01797753	110010009022004	902	110010009022
316668.417827298	4311873.11460674	110010009022003	902	110010009022
316668.417827298	4311923.21123596	110010009022003	902	110010009022
316668.417827298	4311973.30786517	110010009022003	902	110010009022
316718.487465181	4311622.63146067	110010009022016	902	110010009022
316718.487465181	4311672.72808989	110010009022016	902	110010009022
316718.487465181	4311722.8247191	110010009022016	902	110010009022
316718.487465181	4311772.92134831	110010009022003	902	110010009022
316718.487465181	4311823.01797753	110010009022003	902	110010009022
316718.487465181	4311873.11460674	110010009022002	902	110010009022
316718.487465181	4311923.21123596	110010009022002	902	110010009022
316718.487465181	4311973.30786517	110010009022002	902	110010009022
316718.487465181	4312023.40449438	110010009022002	902	110010009022
316718.487465181	4312073.5011236	110010009022002	902	110010009022
316768.557103064	4311522.43820225	110010009022007	902	110010009022
316768.557103064	4311572.53483146	110010009022016	902	110010009022
316768.557103064	4311622.63146067	110010009022016	902	110010009022
316768.557103064	4311672.72808989	110010009022017	902	110010009022
316768.557103064	4311722.8247191	110010009022006	902	110010009022
316768.557103064	4311772.92134831	110010009022002	902	110010009022
316768.557103064	4311823.01797753	110010009022002	902	110010009022
316768.557103064	4311873.11460674	110010009022002	902	110010009022
316768.557103064	4311923.21123596	110010009022002	902	110010009022
316768.557103064	4311973.30786517	110010009022002	902	110010009022
316768.557103064	4312023.40449438	110010009022002	902	110010009022
316768.557103064	4312073.5011236	110010009022002	902	110010009022
316768.557103064	4312123.59775281	110010009022002	902	110010009022
316818.626740947	4311472.34157303	110010009022016	902	110010009022
316818.626740947	4311522.43820225	110010009022016	902	110010009022
316818.626740947	4311572.53483146	110010009022017	902	110010009022
316818.626740947	4311622.63146067	110010009022006	902	110010009022
316818.626740947	4311672.72808989	110010009022006	902	110010009022
316818.626740947	4311722.8247191	110010009022006	902	110010009022
316818.626740947	4311772.92134831	110010009022002	902	110010009022
316818.626740947	4311823.01797753	110010009022002	902	110010009022
316818.626740947	4311873.11460674	110010009022002	902	110010009022
316818.626740947	4311923.21123596	110010009022002	902	110010009022
316818.626740947	4311973.30786517	110010009022002	902	110010009022
316818.626740947	4312023.40449438	110010009022002	902	110010009022
316818.626740947	4312073.5011236	110010009022002	902	110010009022
316818.626740947	4312123.59775281	110010009022002	902	110010009022
316818.626740947	4312173.69438202	110010009022000	902	110010009022
316868.69637883	4311422.24494382	110010009022016	902	110010009022
316868.69637883	4311472.34157303	110010009022016	902	110010009022
316868.69637883	4311522.43820225	110010009022017	902	110010009022
316868.69637883	4311572.53483146	110010009022006	902	110010009022
316868.69637883	4311622.63146067	110010009022006	902	110010009022
316868.69637883	4311672.72808989	110010009022006	902	110010009022
316868.69637883	4311722.8247191	110010009022006	902	110010009022
316868.69637883	4311772.92134831	110010009022002	902	110010009022
316868.69637883	4311823.01797753	110010009022002	902	110010009022
316868.69637883	4311873.11460674	110010009022002	902	110010009022
316868.69637883	4311923.21123596	110010009022002	902	110010009022
316868.69637883	4311973.30786517	110010009022002	902	110010009022
316868.69637883	4312023.40449438	110010009022001	902	110010009022
316868.69637883	4312073.5011236	110010009022001	902	110010009022
316868.69637883	4312123.59775281	110010009022000	902	110010009022
316868.69637883	4312173.69438202	110010009022000	902	110010009022
316918.766016713	4311271.95505618	110010009022016	902	110010009022
316918.766016713	4311322.05168539	110010009022016	902	110010009022
316918.766016713	4311372.14831461	110010009022016	902	110010009022
316918.766016713	4311422.24494382	110010009022017	902	110010009022
316918.766016713	4311472.34157303	110010009022018	902	110010009022
316918.766016713	4311522.43820225	110010009022018	902	110010009022
316918.766016713	4311572.53483146	110010009022006	902	110010009022
316918.766016713	4311622.63146067	110010009022006	902	110010009022
316918.766016713	4311672.72808989	110010009022005	902	110010009022
316918.766016713	4311722.8247191	110010009022005	902	110010009022
316918.766016713	4311772.92134831	110010009022002	902	110010009022
316918.766016713	4311823.01797753	110010009022002	902	110010009022
316918.766016713	4311873.11460674	110010009022002	902	110010009022
316918.766016713	4311923.21123596	110010009022002	902	110010009022
316918.766016713	4311973.30786517	110010009022001	902	110010009022
316918.766016713	4312023.40449438	110010009022001	902	110010009022
316918.766016713	4312073.5011236	110010009022001	902	110010009022
316918.766016713	4312123.59775281	110010009022000	902	110010009022
316918.766016713	4312173.69438202	110010009022000	902	110010009022
316968.835654596	4311221.85842697	110010009022016	902	110010009022
316968.835654596	4311271.95505618	110010009022017	902	110010009022
316968.835654596	4311322.05168539	110010009022018	902	110010009022
316968.835654596	4311372.14831461	110010009022018	902	110010009022
316968.835654596	4311422.24494382	110010009022018	902	110010009022
316968.835654596	4311472.34157303	110010009022018	902	110010009022
316968.835654596	4311522.43820225	110010009022018	902	110010009022
316968.835654596	4311572.53483146	110010009022030	902	110010009022
316968.835654596	4311622.63146067	110010009022005	902	110010009022
316968.835654596	4311672.72808989	110010009022005	902	110010009022
316968.835654596	4311722.8247191	110010009022005	902	110010009022
316968.835654596	4311772.92134831	110010009022002	902	110010009022
316968.835654596	4311823.01797753	110010009012024	901	110010009012
316968.835654596	4311873.11460674	110010009012024	901	110010009012
316968.835654596	4311923.21123596	110010009012024	901	110010009012
316968.835654596	4311973.30786517	110010009012004	901	110010009012
316968.835654596	4312023.40449438	110010009012004	901	110010009012
316968.835654596	4312073.5011236	110010009012004	901	110010009012
316968.835654596	4312123.59775281	110010009012004	901	110010009012
316968.835654596	4312173.69438202	110010009012004	901	110010009012
317018.905292479	4311171.76179775	110010009022019	902	110010009022
317018.905292479	4311221.85842697	110010009022019	902	110010009022
317018.905292479	4311271.95505618	110010009022019	902	110010009022
317018.905292479	4311322.05168539	110010009022018	902	110010009022
317018.905292479	4311372.14831461	110010009022018	902	110010009022
317018.905292479	4311422.24494382	110010009022018	902	110010009022
317018.905292479	4311472.34157303	110010009022018	902	110010009022
317018.905292479	4311522.43820225	110010009022030	902	110010009022
317018.905292479	4311572.53483146	110010009022030	902	110010009022
317018.905292479	4311622.63146067	110010009022005	902	110010009022
317018.905292479	4311672.72808989	110010009022005	902	110010009022
317018.905292479	4311722.8247191	110010009011003	901	110010009011
317018.905292479	4311772.92134831	110010009012024	901	110010009012
317018.905292479	4311823.01797753	110010009012024	901	110010009012
317018.905292479	4311873.11460674	110010009012024	901	110010009012
317018.905292479	4311923.21123596	110010009012024	901	110010009012
317018.905292479	4311973.30786517	110010009012004	901	110010009012
317018.905292479	4312023.40449438	110010009012004	901	110010009012
317018.905292479	4312073.5011236	110010009012004	901	110010009012
317018.905292479	4312123.59775281	110010009012005	901	110010009012
317018.905292479	4312173.69438202	110010009012005	901	110010009012
317068.974930362	4311071.56853933	110010009022022	902	110010009022
317068.974930362	4311121.66516854	110010009022022	902	110010009022
317068.974930362	4311171.76179775	110010009022019	902	110010009022
317068.974930362	4311221.85842697	110010009022019	902	110010009022
317068.974930362	4311271.95505618	110010009022019	902	110010009022
317068.974930362	4311322.05168539	110010009022018	902	110010009022
317068.974930362	4311372.14831461	110010009022018	902	110010009022
317068.974930362	4311422.24494382	110010009022030	902	110010009022
317068.974930362	4311472.34157303	110010009022030	902	110010009022
317068.974930362	4311522.43820225	110010009022030	902	110010009022
317068.974930362	4311572.53483146	110010009022030	902	110010009022
317068.974930362	4311622.63146067	110010009011003	901	110010009011
317068.974930362	4311672.72808989	110010009011003	901	110010009011
317068.974930362	4311722.8247191	110010009011003	901	110010009011
317068.974930362	4311772.92134831	110010009012024	901	110010009012
317068.974930362	4311823.01797753	110010009012024	901	110010009012
317068.974930362	4311873.11460674	110010009012024	901	110010009012
317068.974930362	4311923.21123596	110010009012024	901	110010009012
317068.974930362	4311973.30786517	110010009012004	901	110010009012
317068.974930362	4312023.40449438	110010009012004	901	110010009012
317068.974930362	4312073.5011236	110010009012004	901	110010009012
317068.974930362	4312123.59775281	110010009012005	901	110010009012
317068.974930362	4312173.69438202	110010009012005	901	110010009012
317119.044568245	4310971.3752809	110010009022022	902	110010009022
317119.044568245	4311021.47191011	110010009022022	902	110010009022
317119.044568245	4311071.56853933	110010009022022	902	110010009022
317119.044568245	4311121.66516854	110010009022022	902	110010009022
317119.044568245	4311171.76179775	110010009022019	902	110010009022
317119.044568245	4311221.85842697	110010009022019	902	110010009022
317119.044568245	4311271.95505618	110010009022019	902	110010009022
317119.044568245	4311322.05168539	110010009022029	902	110010009022
317119.044568245	4311372.14831461	110010009022030	902	110010009022
317119.044568245	4311422.24494382	110010009022030	902	110010009022
317119.044568245	4311472.34157303	110010009022030	902	110010009022
317119.044568245	4311522.43820225	110010009011004	901	110010009011
317119.044568245	4311572.53483146	110010009011004	901	110010009011
317119.044568245	4311622.63146067	110010009011004	901	110010009011
317119.044568245	4311672.72808989	110010009011003	901	110010009011
317119.044568245	4311722.8247191	110010009011003	901	110010009011
317119.044568245	4311772.92134831	110010009012024	901	110010009012
317119.044568245	4311823.01797753	110010009012024	901	110010009012
317119.044568245	4311873.11460674	110010009012024	901	110010009012
317119.044568245	4311923.21123596	110010009012024	901	110010009012
317119.044568245	4311973.30786517	110010009012004	901	110010009012
317119.044568245	4312023.40449438	110010009012004	901	110010009012
317119.044568245	4312073.5011236	110010009012004	901	110010009012
317119.044568245	4312123.59775281	110010009012004	901	110010009012
317169.114206128	4310871.18202247	110010009022021	902	110010009022
317169.114206128	4310921.27865169	110010009022021	902	110010009022
317169.114206128	4310971.3752809	110010009022022	902	110010009022
317169.114206128	4311021.47191011	110010009022022	902	110010009022
317169.114206128	4311071.56853933	110010009022027	902	110010009022
317169.114206128	4311121.66516854	110010009022027	902	110010009022
317169.114206128	4311171.76179775	110010009022027	902	110010009022
317169.114206128	4311221.85842697	110010009022019	902	110010009022
317169.114206128	4311271.95505618	110010009022029	902	110010009022
317169.114206128	4311322.05168539	110010009022029	902	110010009022
317169.114206128	4311372.14831461	110010009022029	902	110010009022
317169.114206128	4311422.24494382	110010009022030	902	110010009022
317169.114206128	4311472.34157303	110010009011004	901	110010009011
317169.114206128	4311522.43820225	110010009011004	901	110010009011
317169.114206128	4311572.53483146	110010009011004	901	110010009011
317169.114206128	4311622.63146067	110010009011004	901	110010009011
317169.114206128	4311672.72808989	110010009011003	901	110010009011
317169.114206128	4311722.8247191	110010009011003	901	110010009011
317169.114206128	4311772.92134831	110010009012024	901	110010009012
317169.114206128	4311823.01797753	110010009012024	901	110010009012
317169.114206128	4311873.11460674	110010009012024	901	110010009012
317169.114206128	4311923.21123596	110010009012024	901	110010009012
317169.114206128	4311973.30786517	110010009012004	901	110010009012
317169.114206128	4312023.40449438	110010009012004	901	110010009012
317169.114206128	4312073.5011236	110010009012004	901	110010009012
317169.114206128	4312123.59775281	110010009012004	901	110010009012
317219.183844011	4310770.98876404	110010009022020	902	110010009022
317219.183844011	4310821.08539326	110010009022021	902	110010009022
317219.183844011	4310871.18202247	110010009022021	902	110010009022
317219.183844011	4310921.27865169	110010009022021	902	110010009022
317219.183844011	4310971.3752809	110010009022026	902	110010009022
317219.183844011	4311021.47191011	110010009022027	902	110010009022
317219.183844011	4311071.56853933	110010009022027	902	110010009022
317219.183844011	4311121.66516854	110010009022027	902	110010009022
317219.183844011	4311171.76179775	110010009022027	902	110010009022
317219.183844011	4311221.85842697	110010009022028	902	110010009022
317219.183844011	4311271.95505618	110010009022029	902	110010009022
317219.183844011	4311322.05168539	110010009022029	902	110010009022
317219.183844011	4311372.14831461	110010009022029	902	110010009022
317219.183844011	4311422.24494382	110010009011010	901	110010009011
317219.183844011	4311472.34157303	110010009011004	901	110010009011
317219.183844011	4311522.43820225	110010009011004	901	110010009011
317219.183844011	4311572.53483146	110010009011004	901	110010009011
317219.183844011	4311622.63146067	110010009011004	901	110010009011
317219.183844011	4311672.72808989	110010009011003	901	110010009011
317219.183844011	4311722.8247191	110010009011003	901	110010009011
317219.183844011	4311772.92134831	110010009012024	901	110010009012
317219.183844011	4311823.01797753	110010009012024	901	110010009012
317219.183844011	4311873.11460674	110010009012024	901	110010009012
317219.183844011	4311923.21123596	110010009012024	901	110010009012
317219.183844011	4311973.30786517	110010009012004	901	110010009012
317219.183844011	4312023.40449438	110010009012004	901	110010009012
317269.253481894	4310720.89213483	110010009022020	902	110010009022
317269.253481894	4310770.98876404	110010009022020	902	110010009022
317269.253481894	4310821.08539326	110010009022020	902	110010009022
317269.253481894	4310871.18202247	110010009022026	902	110010009022
317269.253481894	4310921.27865169	110010009022026	902	110010009022
317269.253481894	4310971.3752809	110010009022026	902	110010009022
317269.253481894	4311021.47191011	110010009022026	902	110010009022
317269.253481894	4311071.56853933	110010009022027	902	110010009022
317269.253481894	4311121.66516854	110010009022028	902	110010009022
317269.253481894	4311171.76179775	110010009022028	902	110010009022
317269.253481894	4311221.85842697	110010009022028	902	110010009022
317269.253481894	4311271.95505618	110010009022028	902	110010009022
317269.253481894	4311322.05168539	110010009011010	901	110010009011
317269.253481894	4311372.14831461	110010009011010	901	110010009011
317269.253481894	4311422.24494382	110010009011010	901	110010009011
317269.253481894	4311472.34157303	110010009011010	901	110010009011
317269.253481894	4311522.43820225	110010009011004	901	110010009011
317269.253481894	4311572.53483146	110010009011004	901	110010009011
317269.253481894	4311622.63146067	110010009011004	901	110010009011
317269.253481894	4311672.72808989	110010009011004	901	110010009011
317269.253481894	4311722.8247191	110010009011003	901	110010009011
317269.253481894	4311772.92134831	110010009012024	901	110010009012
317269.253481894	4311823.01797753	110010009012024	901	110010009012
317269.253481894	4311873.11460674	110010009012024	901	110010009012
317269.253481894	4311923.21123596	110010009012024	901	110010009012
317269.253481894	4311973.30786517	110010009012004	901	110010009012
317269.253481894	4312023.40449438	110010009012004	901	110010009012
317319.323119777	4310670.79550562	110010009022020	902	110010009022
317319.323119777	4310720.89213483	110010009022020	902	110010009022
317319.323119777	4310770.98876404	110010009022020	902	110010009022
317319.323119777	4310821.08539326	110010009022039	902	110010009022
317319.323119777	4310871.18202247	110010009022039	902	110010009022
317319.323119777	4310921.27865169	110010009022026	902	110010009022
317319.323119777	4310971.3752809	110010009022026	902	110010009022
317319.323119777	4311021.47191011	110010009022026	902	110010009022
317319.323119777	4311071.56853933	110010009022031	902	110010009022
317319.323119777	4311121.66516854	110010009022028	902	110010009022
317319.323119777	4311171.76179775	110010009022028	902	110010009022
317319.323119777	4311221.85842697	110010009022028	902	110010009022
317319.323119777	4311271.95505618	110010009011011	901	110010009011
317319.323119777	4311322.05168539	110010009011010	901	110010009011
317319.323119777	4311372.14831461	110010009011010	901	110010009011
317319.323119777	4311422.24494382	110010009011010	901	110010009011
317319.323119777	4311472.34157303	110010009011010	901	110010009011
317319.323119777	4311522.43820225	110010009011010	901	110010009011
317319.323119777	4311572.53483146	110010009011004	901	110010009011
317319.323119777	4311622.63146067	110010009011004	901	110010009011
317319.323119777	4311672.72808989	110010009011004	901	110010009011
317319.323119777	4311722.8247191	110010009011003	901	110010009011
317319.323119777	4311772.92134831	110010009012024	901	110010009012
317319.323119777	4311823.01797753	110010009012024	901	110010009012
317319.323119777	4311873.11460674	110010009012024	901	110010009012
317319.323119777	4311923.21123596	110010009012024	901	110010009012
317319.323119777	4311973.30786517	110010009012004	901	110010009012
317319.323119777	4312023.40449438	110010009012004	901	110010009012
317369.39275766	4310520.50561798	110010009022023	902	110010009022
317369.39275766	4310570.60224719	110010009022023	902	110010009022
317369.39275766	4310620.6988764	110010009022023	902	110010009022
317369.39275766	4310670.79550562	110010009022023	902	110010009022
317369.39275766	4310720.89213483	110010009022020	902	110010009022
317369.39275766	4310770.98876404	110010009022039	902	110010009022
317369.39275766	4310821.08539326	110010009022025	902	110010009022
317369.39275766	4310871.18202247	110010009022025	902	110010009022
317369.39275766	4310921.27865169	110010009022026	902	110010009022
317369.39275766	4310971.3752809	110010009022026	902	110010009022
317369.39275766	4311021.47191011	110010009022031	902	110010009022
317369.39275766	4311071.56853933	110010009022031	902	110010009022
317369.39275766	4311121.66516854	110010009022028	902	110010009022
317369.39275766	4311171.76179775	110010009011011	901	110010009011
317369.39275766	4311221.85842697	110010009011011	901	110010009011
317369.39275766	4311271.95505618	110010009011011	901	110010009011
317369.39275766	4311322.05168539	110010009011011	901	110010009011
317369.39275766	4311372.14831461	110010009011010	901	110010009011
317369.39275766	4311422.24494382	110010009011010	901	110010009011
317369.39275766	4311472.34157303	110010009011010	901	110010009011
317369.39275766	4311522.43820225	110010009011010	901	110010009011
317369.39275766	4311572.53483146	110010009011004	901	110010009011
317369.39275766	4311622.63146067	110010009011004	901	110010009011
317369.39275766	4311672.72808989	110010009011003	901	110010009011
317369.39275766	4311722.8247191	110010009011003	901	110010009011
317369.39275766	4311772.92134831	110010009012024	901	110010009012
317369.39275766	4311823.01797753	110010009012024	901	110010009012
317369.39275766	4311873.11460674	110010009012024	901	110010009012
317369.39275766	4311923.21123596	110010009012024	901	110010009012
317369.39275766	4311973.30786517	110010009012004	901	110010009012
317369.39275766	4312023.40449438	110010009012004	901	110010009012
317419.462395543	4310520.50561798	110010009022023	902	110010009022
317419.462395543	4310570.60224719	110010009022023	902	110010009022
317419.462395543	4310620.6988764	110010009022023	902	110010009022
317419.462395543	4310670.79550562	110010009022023	902	110010009022
317419.462395543	4310720.89213483	110010009022023	902	110010009022
317419.462395543	4310770.98876404	110010009022025	902	110010009022
317419.462395543	4310821.08539326	110010009022025	902	110010009022
317419.462395543	4310871.18202247	110010009022025	902	110010009022
317419.462395543	4310921.27865169	110010009022032	902	110010009022
317419.462395543	4310971.3752809	110010009022031	902	110010009022
317419.462395543	4311021.47191011	110010009022031	902	110010009022
317419.462395543	4311071.56853933	110010009011016	901	110010009011
317419.462395543	4311121.66516854	110010009011016	901	110010009011
317419.462395543	4311171.76179775	110010009011011	901	110010009011
317419.462395543	4311221.85842697	110010009011011	901	110010009011
317419.462395543	4311271.95505618	110010009011011	901	110010009011
317419.462395543	4311322.05168539	110010009011011	901	110010009011
317419.462395543	4311372.14831461	110010009011009	901	110010009011
317419.462395543	4311422.24494382	110010009011010	901	110010009011
317419.462395543	4311472.34157303	110010009011010	901	110010009011
317419.462395543	4311522.43820225	110010009011010	901	110010009011
317419.462395543	4311572.53483146	110010009011004	901	110010009011
317419.462395543	4311622.63146067	110010009011004	901	110010009011
317419.462395543	4311672.72808989	110010009011003	901	110010009011
317419.462395543	4311722.8247191	110010009011003	901	110010009011
317419.462395543	4311772.92134831	110010009012024	901	110010009012
317419.462395543	4311823.01797753	110010009012024	901	110010009012
317419.462395543	4311873.11460674	110010009012024	901	110010009012
317419.462395543	4311923.21123596	110010009012024	901	110010009012
317419.462395543	4311973.30786517	110010009012004	901	110010009012
317419.462395543	4312023.40449438	110010009012004	901	110010009012
317469.532033426	4310470.40898876	110010009022023	902	110010009022
317469.532033426	4310520.50561798	110010009022023	902	110010009022
317469.532033426	4310570.60224719	110010009022023	902	110010009022
317469.532033426	4310620.6988764	110010009022023	902	110010009022
317469.532033426	4310670.79550562	110010009022023	902	110010009022
317469.532033426	4310720.89213483	110010009022023	902	110010009022
317469.532033426	4310770.98876404	110010009022023	902	110010009022
317469.532033426	4310821.08539326	110010009022025	902	110010009022
317469.532033426	4310871.18202247	110010009022032	902	110010009022
317469.532033426	4310921.27865169	110010009022032	902	110010009022
317469.532033426	4310971.3752809	110010009022032	902	110010009022
317469.532033426	4311021.47191011	110010009011016	901	110010009011
317469.532033426	4311071.56853933	110010009011016	901	110010009011
317469.532033426	4311121.66516854	110010009011016	901	110010009011
317469.532033426	4311171.76179775	110010009011011	901	110010009011
317469.532033426	4311221.85842697	110010009011012	901	110010009011
317469.532033426	4311271.95505618	110010009011012	901	110010009011
317469.532033426	4311322.05168539	110010009011011	901	110010009011
317469.532033426	4311372.14831461	110010009011009	901	110010009011
317469.532033426	4311422.24494382	110010009011010	901	110010009011
317469.532033426	4311472.34157303	110010009011010	901	110010009011
317469.532033426	4311522.43820225	110010009011010	901	110010009011
317469.532033426	4311572.53483146	110010009011005	901	110010009011
317469.532033426	4311622.63146067	110010009011005	901	110010009011
317469.532033426	4311672.72808989	110010009011002	901	110010009011
317469.532033426	4311722.8247191	110010009011002	901	110010009011
317469.532033426	4311772.92134831	110010009012023	901	110010009012
317469.532033426	4311823.01797753	110010009012004	901	110010009012
317469.532033426	4311873.11460674	110010009012004	901	110010009012
317469.532033426	4311923.21123596	110010009012004	901	110010009012
317469.532033426	4311973.30786517	110010009012004	901	110010009012
317469.532033426	4312023.40449438	110010009012004	901	110010009012
317519.601671309	4310420.31235955	110010009022023	902	110010009022
317519.601671309	4310470.40898876	110010009022023	902	110010009022
317519.601671309	4310520.50561798	110010009022023	902	110010009022
317519.601671309	4310570.60224719	110010009022023	902	110010009022
317519.601671309	4310620.6988764	110010009022023	902	110010009022
317519.601671309	4310670.79550562	110010009022023	902	110010009022
317519.601671309	4310720.89213483	110010009022023	902	110010009022
317519.601671309	4310770.98876404	110010009022023	902	110010009022
317519.601671309	4310821.08539326	110010009022032	902	110010009022
317519.601671309	4310871.18202247	110010009022032	902	110010009022
317519.601671309	4310921.27865169	110010009022032	902	110010009022
317519.601671309	4310971.3752809	110010009011016	901	110010009011
317519.601671309	4311021.47191011	110010009011016	901	110010009011
317519.601671309	4311071.56853933	110010009011016	901	110010009011
317519.601671309	4311121.66516854	110010009011016	901	110010009011
317519.601671309	4311171.76179775	110010009011012	901	110010009011
317519.601671309	4311221.85842697	110010009011012	901	110010009011
317519.601671309	4311271.95505618	110010009011012	901	110010009011
317519.601671309	4311322.05168539	110010009011009	901	110010009011
317519.601671309	4311372.14831461	110010009011009	901	110010009011
317519.601671309	4311422.24494382	110010009011009	901	110010009011
317519.601671309	4311472.34157303	110010009011010	901	110010009011
317519.601671309	4311522.43820225	110010009011010	901	110010009011
317519.601671309	4311572.53483146	110010009011010	901	110010009011
317519.601671309	4311622.63146067	110010009011005	901	110010009011
317519.601671309	4311672.72808989	110010009011002	901	110010009011
317519.601671309	4311722.8247191	110010009011002	901	110010009011
317519.601671309	4311772.92134831	110010009012023	901	110010009012
317519.601671309	4311823.01797753	110010009012023	901	110010009012
317519.601671309	4311873.11460674	110010009012004	901	110010009012
317519.601671309	4311923.21123596	110010009012004	901	110010009012
317519.601671309	4311973.30786517	110010009012004	901	110010009012
317519.601671309	4312023.40449438	110010009012004	901	110010009012
317569.671309192	4310370.21573034	110010009022023	902	110010009022
317569.671309192	4310420.31235955	110010009022023	902	110010009022
317569.671309192	4310470.40898876	110010009022023	902	110010009022
317569.671309192	4310520.50561798	110010009022023	902	110010009022
317569.671309192	4310570.60224719	110010009022023	902	110010009022
317569.671309192	4310620.6988764	110010009022023	902	110010009022
317569.671309192	4310670.79550562	110010009022023	902	110010009022
317569.671309192	4310720.89213483	110010009022033	902	110010009022
317569.671309192	4310770.98876404	110010009022033	902	110010009022
317569.671309192	4310821.08539326	110010009022032	902	110010009022
317569.671309192	4310871.18202247	110010009022032	902	110010009022
317569.671309192	4310921.27865169	110010009011017	901	110010009011
317569.671309192	4310971.3752809	110010009011016	901	110010009011
317569.671309192	4311021.47191011	110010009011016	901	110010009011
317569.671309192	4311071.56853933	110010009011016	901	110010009011
317569.671309192	4311121.66516854	110010009011016	901	110010009011
317569.671309192	4311171.76179775	110010009011012	901	110010009011
317569.671309192	4311221.85842697	110010009011012	901	110010009011
317569.671309192	4311271.95505618	110010009011012	901	110010009011
317569.671309192	4311322.05168539	110010009011009	901	110010009011
317569.671309192	4311372.14831461	110010009011009	901	110010009011
317569.671309192	4311422.24494382	110010009011009	901	110010009011
317569.671309192	4311472.34157303	110010009011009	901	110010009011
317569.671309192	4311522.43820225	110010009011006	901	110010009011
317569.671309192	4311572.53483146	110010009011006	901	110010009011
317569.671309192	4311622.63146067	110010009011005	901	110010009011
317569.671309192	4311672.72808989	110010009011002	901	110010009011
317569.671309192	4311722.8247191	110010009011002	901	110010009011
317569.671309192	4311772.92134831	110010009012023	901	110010009012
317569.671309192	4311823.01797753	110010009012023	901	110010009012
317569.671309192	4311873.11460674	110010009012023	901	110010009012
317569.671309192	4311923.21123596	110010009012023	901	110010009012
317569.671309192	4311973.30786517	110010009012004	901	110010009012
317569.671309192	4312023.40449438	110010009012004	901	110010009012
317619.740947075	4310320.11910112	110010009022023	902	110010009022
317619.740947075	4310370.21573034	110010009022023	902	110010009022
317619.740947075	4310420.31235955	110010009022023	902	110010009022
317619.740947075	4310470.40898876	110010009022023	902	110010009022
317619.740947075	4310520.50561798	110010009022023	902	110010009022
317619.740947075	4310570.60224719	110010009022023	902	110010009022
317619.740947075	4310620.6988764	110010009022023	902	110010009022
317619.740947075	4310670.79550562	110010009022033	902	110010009022
317619.740947075	4310720.89213483	110010009022033	902	110010009022
317619.740947075	4310770.98876404	110010009022033	902	110010009022
317619.740947075	4310821.08539326	110010009021008	902	110010009021
317619.740947075	4310871.18202247	110010009011017	901	110010009011
317619.740947075	4310921.27865169	110010009011017	901	110010009011
317619.740947075	4310971.3752809	110010009011017	901	110010009011
317619.740947075	4311021.47191011	110010009011016	901	110010009011
317619.740947075	4311071.56853933	110010009011016	901	110010009011
317619.740947075	4311121.66516854	110010009011016	901	110010009011
317619.740947075	4311171.76179775	110010009011012	901	110010009011
317619.740947075	4311221.85842697	110010009011012	901	110010009011
317619.740947075	4311271.95505618	110010009011012	901	110010009011
317619.740947075	4311322.05168539	110010009011009	901	110010009011
317619.740947075	4311372.14831461	110010009011009	901	110010009011
317619.740947075	4311422.24494382	110010009011009	901	110010009011
317619.740947075	4311472.34157303	110010009011009	901	110010009011
317619.740947075	4311522.43820225	110010009011006	901	110010009011
317619.740947075	4311572.53483146	110010009011006	901	110010009011
317619.740947075	4311622.63146067	110010009011001	901	110010009011
317619.740947075	4311672.72808989	110010009011002	901	110010009011
317619.740947075	4311722.8247191	110010009011002	901	110010009011
317619.740947075	4311772.92134831	110010009012023	901	110010009012
317619.740947075	4311823.01797753	110010009012023	901	110010009012
317619.740947075	4311873.11460674	110010009012023	901	110010009012
317619.740947075	4311923.21123596	110010009012023	901	110010009012
317619.740947075	4311973.30786517	110010009012023	901	110010009012
317619.740947075	4312023.40449438	110010009012023	901	110010009012
317669.810584958	4310219.9258427	110010009022038	902	110010009022
317669.810584958	4310270.02247191	110010009022023	902	110010009022
317669.810584958	4310320.11910112	110010009022023	902	110010009022
317669.810584958	4310370.21573034	110010009022023	902	110010009022
317669.810584958	4310420.31235955	110010009022023	902	110010009022
317669.810584958	4310470.40898876	110010009022023	902	110010009022
317669.810584958	4310520.50561798	110010009022023	902	110010009022
317669.810584958	4310570.60224719	110010009022023	902	110010009022
317669.810584958	4310620.6988764	110010009022024	902	110010009022
317669.810584958	4310670.79550562	110010009022033	902	110010009022
317669.810584958	4310720.89213483	110010009022033	902	110010009022
317669.810584958	4310770.98876404	110010009021008	902	110010009021
317669.810584958	4310821.08539326	110010009021008	902	110010009021
317669.810584958	4310871.18202247	110010009011017	901	110010009011
317669.810584958	4310921.27865169	110010009011017	901	110010009011
317669.810584958	4310971.3752809	110010009011017	901	110010009011
317669.810584958	4311021.47191011	110010009011016	901	110010009011
317669.810584958	4311071.56853933	110010009011016	901	110010009011
317669.810584958	4311121.66516854	110010009011016	901	110010009011
317669.810584958	4311171.76179775	110010009011012	901	110010009011
317669.810584958	4311221.85842697	110010009011012	901	110010009011
317669.810584958	4311271.95505618	110010009011012	901	110010009011
317669.810584958	4311322.05168539	110010009011009	901	110010009011
317669.810584958	4311372.14831461	110010009011009	901	110010009011
317669.810584958	4311422.24494382	110010009011008	901	110010009011
317669.810584958	4311472.34157303	110010009011008	901	110010009011
317669.810584958	4311522.43820225	110010009011008	901	110010009011
317669.810584958	4311572.53483146	110010009011006	901	110010009011
317669.810584958	4311622.63146067	110010009011006	901	110010009011
317669.810584958	4311672.72808989	110010009011001	901	110010009011
317669.810584958	4311722.8247191	110010009011001	901	110010009011
317669.810584958	4311772.92134831	110010009012023	901	110010009012
317669.810584958	4311823.01797753	110010009012023	901	110010009012
317669.810584958	4311873.11460674	110010009012023	901	110010009012
317669.810584958	4311923.21123596	110010009012023	901	110010009012
317669.810584958	4311973.30786517	110010009012023	901	110010009012
317669.810584958	4312023.40449438	110010009012023	901	110010009012
317669.810584958	4312073.5011236	110010009012023	901	110010009012
317669.810584958	4312123.59775281	110010009012017	901	110010009012
317669.810584958	4312173.69438202	110010009012017	901	110010009012
317669.810584958	4312223.79101124	110010009012017	901	110010009012
317669.810584958	4312273.88764045	110010009012017	901	110010009012
317669.810584958	4312323.98426966	110010009012017	901	110010009012
317669.810584958	4312374.08089888	110010009012017	901	110010009012
317669.810584958	4312424.17752809	110010009012017	901	110010009012
317719.880222841	4310119.73258427	110010009022038	902	110010009022
317719.880222841	4310169.82921348	110010009022023	902	110010009022
317719.880222841	4310219.9258427	110010009022023	902	110010009022
317719.880222841	4310270.02247191	110010009022023	902	110010009022
317719.880222841	4310320.11910112	110010009022023	902	110010009022
317719.880222841	4310370.21573034	110010009022023	902	110010009022
317719.880222841	4310420.31235955	110010009022023	902	110010009022
317719.880222841	4310470.40898876	110010009022023	902	110010009022
317719.880222841	4310520.50561798	110010009022023	902	110010009022
317719.880222841	4310570.60224719	110010009022024	902	110010009022
317719.880222841	4310620.6988764	110010009022024	902	110010009022
317719.880222841	4310670.79550562	110010009022024	902	110010009022
317719.880222841	4310720.89213483	110010009021007	902	110010009021
317719.880222841	4310770.98876404	110010009021007	902	110010009021
317719.880222841	4310821.08539326	110010009021008	902	110010009021
317719.880222841	4310871.18202247	110010009011017	901	110010009011
317719.880222841	4310921.27865169	110010009011017	901	110010009011
317719.880222841	4310971.3752809	110010009011017	901	110010009011
317719.880222841	4311021.47191011	110010009011016	901	110010009011
317719.880222841	4311071.56853933	110010009011016	901	110010009011
317719.880222841	4311121.66516854	110010009011016	901	110010009011
317719.880222841	4311171.76179775	110010009011012	901	110010009011
317719.880222841	4311221.85842697	110010009011012	901	110010009011
317719.880222841	4311271.95505618	110010009011012	901	110010009011
317719.880222841	4311322.05168539	110010009011009	901	110010009011
317719.880222841	4311372.14831461	110010009011009	901	110010009011
317719.880222841	4311422.24494382	110010009011008	901	110010009011
317719.880222841	4311472.34157303	110010009011008	901	110010009011
317719.880222841	4311522.43820225	110010009011008	901	110010009011
317719.880222841	4311572.53483146	110010009011008	901	110010009011
317719.880222841	4311622.63146067	110010009011006	901	110010009011
317719.880222841	4311672.72808989	110010009011001	901	110010009011
317719.880222841	4311722.8247191	110010009011001	901	110010009011
317719.880222841	4311772.92134831	110010009012023	901	110010009012
317719.880222841	4311823.01797753	110010009012023	901	110010009012
317719.880222841	4311873.11460674	110010009012023	901	110010009012
317719.880222841	4311923.21123596	110010009012019	901	110010009012
317719.880222841	4311973.30786517	110010009012019	901	110010009012
317719.880222841	4312023.40449438	110010009012019	901	110010009012
317719.880222841	4312073.5011236	110010009012017	901	110010009012
317719.880222841	4312123.59775281	110010009012017	901	110010009012
317719.880222841	4312173.69438202	110010009012017	901	110010009012
317719.880222841	4312223.79101124	110010009012017	901	110010009012
317719.880222841	4312273.88764045	110010009012017	901	110010009012
317719.880222841	4312323.98426966	110010009012017	901	110010009012
317719.880222841	4312374.08089888	110010009012017	901	110010009012
317719.880222841	4312424.17752809	110010009012017	901	110010009012
317719.880222841	4312474.2741573	110010009012011	901	110010009012
317719.880222841	4312524.37078652	110010009012011	901	110010009012
317719.880222841	4312574.46741573	110010009012011	901	110010009012
317719.880222841	4312624.56404494	110010009012011	901	110010009012
317719.880222841	4312674.66067416	110010009012011	901	110010009012
317719.880222841	4312724.75730337	110010009012011	901	110010009012
317719.880222841	4312774.85393258	110010009012011	901	110010009012
317719.880222841	4312824.9505618	110010009012006	901	110010009012
317719.880222841	4312975.24044944	110010009012004	901	110010009012
317769.949860724	4309869.2494382	110010009022013	902	110010009022
317769.949860724	4309919.34606742	110010009022013	902	110010009022
317769.949860724	4309969.44269663	110010009022013	902	110010009022
317769.949860724	4310069.63595506	110010009022038	902	110010009022
317769.949860724	4310119.73258427	110010009022023	902	110010009022
317769.949860724	4310169.82921348	110010009022023	902	110010009022
317769.949860724	4310219.9258427	110010009022023	902	110010009022
317769.949860724	4310270.02247191	110010009022023	902	110010009022
317769.949860724	4310320.11910112	110010009022023	902	110010009022
317769.949860724	4310370.21573034	110010009022023	902	110010009022
317769.949860724	4310420.31235955	110010009022023	902	110010009022
317769.949860724	4310470.40898876	110010009022036	902	110010009022
317769.949860724	4310520.50561798	110010009022024	902	110010009022
317769.949860724	4310570.60224719	110010009022024	902	110010009022
317769.949860724	4310620.6988764	110010009022024	902	110010009022
317769.949860724	4310670.79550562	110010009021007	902	110010009021
317769.949860724	4310720.89213483	110010009021007	902	110010009021
317769.949860724	4310770.98876404	110010009021007	902	110010009021
317769.949860724	4310821.08539326	110010009021007	902	110010009021
317769.949860724	4310871.18202247	110010009021008	902	110010009021
317769.949860724	4310921.27865169	110010009011017	901	110010009011
317769.949860724	4310971.3752809	110010009011017	901	110010009011
317769.949860724	4311021.47191011	110010009011017	901	110010009011
317769.949860724	4311071.56853933	110010009011016	901	110010009011
317769.949860724	4311121.66516854	110010009011016	901	110010009011
317769.949860724	4311171.76179775	110010009011013	901	110010009011
317769.949860724	4311221.85842697	110010009011013	901	110010009011
317769.949860724	4311271.95505618	110010009011013	901	110010009011
317769.949860724	4311322.05168539	110010009011009	901	110010009011
317769.949860724	4311372.14831461	110010009011008	901	110010009011
317769.949860724	4311422.24494382	110010009011008	901	110010009011
317769.949860724	4311472.34157303	110010009011008	901	110010009011
317769.949860724	4311522.43820225	110010009011008	901	110010009011
317769.949860724	4311572.53483146	110010009011008	901	110010009011
317769.949860724	4311622.63146067	110010009011000	901	110010009011
317769.949860724	4311672.72808989	110010009011001	901	110010009011
317769.949860724	4311722.8247191	110010009011001	901	110010009011
317769.949860724	4311772.92134831	110010009012023	901	110010009012
317769.949860724	4311823.01797753	110010009012023	901	110010009012
317769.949860724	4311873.11460674	110010009012019	901	110010009012
317769.949860724	4311923.21123596	110010009012019	901	110010009012
317769.949860724	4311973.30786517	110010009012019	901	110010009012
317769.949860724	4312023.40449438	110010009012017	901	110010009012
317769.949860724	4312073.5011236	110010009012017	901	110010009012
317769.949860724	4312123.59775281	110010009012017	901	110010009012
317769.949860724	4312173.69438202	110010009012017	901	110010009012
317769.949860724	4312223.79101124	110010009012017	901	110010009012
317769.949860724	4312273.88764045	110010009012017	901	110010009012
317769.949860724	4312323.98426966	110010009012017	901	110010009012
317769.949860724	4312374.08089888	110010009012017	901	110010009012
317769.949860724	4312424.17752809	110010009012011	901	110010009012
317769.949860724	4312474.2741573	110010009012011	901	110010009012
317769.949860724	4312524.37078652	110010009012011	901	110010009012
317769.949860724	4312574.46741573	110010009012011	901	110010009012
317769.949860724	4312624.56404494	110010009012009	901	110010009012
317769.949860724	4312674.66067416	110010009012009	901	110010009012
317769.949860724	4312724.75730337	110010009012009	901	110010009012
317769.949860724	4312774.85393258	110010009012011	901	110010009012
317769.949860724	4312824.9505618	110010009012006	901	110010009012
317769.949860724	4312875.04719101	110010009012006	901	110010009012
317769.949860724	4312925.14382022	110010009012006	901	110010009012
317769.949860724	4312975.24044944	110010009012004	901	110010009012
317769.949860724	4313025.33707865	110010009012004	901	110010009012
317820.019498607	4309769.05617977	110010008014008	801	110010008014
317820.019498607	4309819.15280899	110010008014008	801	110010008014
317820.019498607	4309869.2494382	110010008014008	801	110010008014
317820.019498607	4309919.34606742	110010008014009	801	110010008014
317820.019498607	4309969.44269663	110010008014008	801	110010008014
317820.019498607	4310019.53932584	110010008014008	801	110010008014
317820.019498607	4310069.63595506	110010009022023	902	110010009022
317820.019498607	4310119.73258427	110010009022023	902	110010009022
317820.019498607	4310169.82921348	110010009022023	902	110010009022
317820.019498607	4310219.9258427	110010009022023	902	110010009022
317820.019498607	4310270.02247191	110010009022023	902	110010009022
317820.019498607	4310320.11910112	110010009022023	902	110010009022
317820.019498607	4310370.21573034	110010009022023	902	110010009022
317820.019498607	4310420.31235955	110010009022036	902	110010009022
317820.019498607	4310470.40898876	110010009022036	902	110010009022
317820.019498607	4310520.50561798	110010009022036	902	110010009022
317820.019498607	4310570.60224719	110010009022024	902	110010009022
317820.019498607	4310620.6988764	110010009021007	902	110010009021
317820.019498607	4310670.79550562	110010009021007	902	110010009021
317820.019498607	4310720.89213483	110010009021007	902	110010009021
317820.019498607	4310770.98876404	110010009021007	902	110010009021
317820.019498607	4310821.08539326	110010009021007	902	110010009021
317820.019498607	4310871.18202247	110010009021007	902	110010009021
317820.019498607	4310921.27865169	110010009021007	902	110010009021
317820.019498607	4310971.3752809	110010009011017	901	110010009011
317820.019498607	4311021.47191011	110010009011017	901	110010009011
317820.019498607	4311071.56853933	110010009011016	901	110010009011
317820.019498607	4311121.66516854	110010009011016	901	110010009011
317820.019498607	4311171.76179775	110010009011013	901	110010009011
317820.019498607	4311221.85842697	110010009011013	901	110010009011
317820.019498607	4311271.95505618	110010009011013	901	110010009011
317820.019498607	4311322.05168539	110010009011009	901	110010009011
317820.019498607	4311372.14831461	110010009011008	901	110010009011
317820.019498607	4311422.24494382	110010009011008	901	110010009011
317820.019498607	4311472.34157303	110010009011008	901	110010009011
317820.019498607	4311522.43820225	110010009011008	901	110010009011
317820.019498607	4311572.53483146	110010009011007	901	110010009011
317820.019498607	4311622.63146067	110010009011000	901	110010009011
317820.019498607	4311672.72808989	110010009011000	901	110010009011
317820.019498607	4311722.8247191	110010009012023	901	110010009012
317820.019498607	4311772.92134831	110010009012023	901	110010009012
317820.019498607	4311823.01797753	110010009012019	901	110010009012
317820.019498607	4311873.11460674	110010009012019	901	110010009012
317820.019498607	4311923.21123596	110010009012019	901	110010009012
317820.019498607	4311973.30786517	110010009012020	901	110010009012
317820.019498607	4312023.40449438	110010009012017	901	110010009012
317820.019498607	4312073.5011236	110010009012017	901	110010009012
317820.019498607	4312123.59775281	110010009012017	901	110010009012
317820.019498607	4312173.69438202	110010009012017	901	110010009012
317820.019498607	4312223.79101124	110010009012016	901	110010009012
317820.019498607	4312273.88764045	110010009012016	901	110010009012
317820.019498607	4312323.98426966	110010009012016	901	110010009012
317820.019498607	4312374.08089888	110010009012011	901	110010009012
317820.019498607	4312424.17752809	110010009012011	901	110010009012
317820.019498607	4312474.2741573	110010009012012	901	110010009012
317820.019498607	4312524.37078652	110010009012012	901	110010009012
317820.019498607	4312574.46741573	110010009012009	901	110010009012
317820.019498607	4312624.56404494	110010009012009	901	110010009012
317820.019498607	4312674.66067416	110010009012009	901	110010009012
317820.019498607	4312724.75730337	110010009012009	901	110010009012
317820.019498607	4312774.85393258	110010009012011	901	110010009012
317820.019498607	4312824.9505618	110010009012011	901	110010009012
317820.019498607	4312875.04719101	110010009012006	901	110010009012
317820.019498607	4312925.14382022	110010009012006	901	110010009012
317820.019498607	4312975.24044944	110010009012006	901	110010009012
317820.019498607	4313025.33707865	110010009012006	901	110010009012
317820.019498607	4313075.43370786	110010009012004	901	110010009012
317870.08913649	4309668.86292135	110010008014008	801	110010008014
317870.08913649	4309718.95955056	110010008014008	801	110010008014
317870.08913649	4309769.05617977	110010008014008	801	110010008014
317870.08913649	4309819.15280899	110010008014009	801	110010008014
317870.08913649	4309869.2494382	110010008014008	801	110010008014
317870.08913649	4309919.34606742	110010008014008	801	110010008014
317870.08913649	4309969.44269663	110010008014004	801	110010008014
317870.08913649	4310019.53932584	110010008014007	801	110010008014
317870.08913649	4310069.63595506	110010009022023	902	110010009022
317870.08913649	4310119.73258427	110010009022034	902	110010009022
317870.08913649	4310169.82921348	110010009022034	902	110010009022
317870.08913649	4310219.9258427	110010009022023	902	110010009022
317870.08913649	4310270.02247191	110010009022023	902	110010009022
317870.08913649	4310320.11910112	110010009022035	902	110010009022
317870.08913649	4310370.21573034	110010009022036	902	110010009022
317870.08913649	4310420.31235955	110010009022036	902	110010009022
317870.08913649	4310470.40898876	110010009022036	902	110010009022
317870.08913649	4310520.50561798	110010009021002	902	110010009021
317870.08913649	4310570.60224719	110010009021002	902	110010009021
317870.08913649	4310620.6988764	110010009021007	902	110010009021
317870.08913649	4310670.79550562	110010009021007	902	110010009021
317870.08913649	4310720.89213483	110010009021006	902	110010009021
317870.08913649	4310770.98876404	110010009021006	902	110010009021
317870.08913649	4310821.08539326	110010009021006	902	110010009021
317870.08913649	4310871.18202247	110010009021007	902	110010009021
317870.08913649	4310921.27865169	110010009021007	902	110010009021
317870.08913649	4310971.3752809	110010009021001	902	110010009021
317870.08913649	4311021.47191011	110010009011017	901	110010009011
317870.08913649	4311071.56853933	110010009011016	901	110010009011
317870.08913649	4311121.66516854	110010009011016	901	110010009011
317870.08913649	4311171.76179775	110010009011013	901	110010009011
317870.08913649	4311221.85842697	110010009011013	901	110010009011
317870.08913649	4311271.95505618	110010009011013	901	110010009011
317870.08913649	4311322.05168539	110010009011009	901	110010009011
317870.08913649	4311372.14831461	110010009011009	901	110010009011
317870.08913649	4311422.24494382	110010009011008	901	110010009011
317870.08913649	4311472.34157303	110010009011008	901	110010009011
317870.08913649	4311522.43820225	110010009011007	901	110010009011
317870.08913649	4311572.53483146	110010009011007	901	110010009011
317870.08913649	4311622.63146067	110010009011007	901	110010009011
317870.08913649	4311672.72808989	110010009011000	901	110010009011
317870.08913649	4311722.8247191	110010009012023	901	110010009012
317870.08913649	4311772.92134831	110010009012023	901	110010009012
317870.08913649	4311823.01797753	110010009012019	901	110010009012
317870.08913649	4311873.11460674	110010009012019	901	110010009012
317870.08913649	4311923.21123596	110010009012020	901	110010009012
317870.08913649	4311973.30786517	110010009012020	901	110010009012
317870.08913649	4312023.40449438	110010009012022	901	110010009012
317870.08913649	4312073.5011236	110010009012022	901	110010009012
317870.08913649	4312123.59775281	110010009012022	901	110010009012
317870.08913649	4312173.69438202	110010009012022	901	110010009012
317870.08913649	4312223.79101124	110010009012016	901	110010009012
317870.08913649	4312273.88764045	110010009012016	901	110010009012
317870.08913649	4312323.98426966	110010009012016	901	110010009012
317870.08913649	4312374.08089888	110010009012016	901	110010009012
317870.08913649	4312424.17752809	110010009012016	901	110010009012
317870.08913649	4312474.2741573	110010009012012	901	110010009012
317870.08913649	4312524.37078652	110010009012012	901	110010009012
317870.08913649	4312574.46741573	110010009012009	901	110010009012
317870.08913649	4312624.56404494	110010009012009	901	110010009012
317870.08913649	4312674.66067416	110010009012009	901	110010009012
317870.08913649	4312724.75730337	110010009012009	901	110010009012
317870.08913649	4312774.85393258	110010009012011	901	110010009012
317870.08913649	4312824.9505618	110010009012006	901	110010009012
317870.08913649	4312875.04719101	110010009012006	901	110010009012
317870.08913649	4312925.14382022	110010009012007	901	110010009012
317870.08913649	4312975.24044944	110010009012007	901	110010009012
317870.08913649	4313025.33707865	110010009012006	901	110010009012
317870.08913649	4313075.43370786	110010009012006	901	110010009012
317870.08913649	4313125.53033708	110010009012003	901	110010009012
317920.158774373	4309568.66966292	110010008014008	801	110010008014
317920.158774373	4309618.76629214	110010008014008	801	110010008014
317920.158774373	4309668.86292135	110010008014008	801	110010008014
317920.158774373	4309718.95955056	110010008014010	801	110010008014
317920.158774373	4309769.05617977	110010008014008	801	110010008014
317920.158774373	4309819.15280899	110010008014011	801	110010008014
317920.158774373	4309869.2494382	110010008014004	801	110010008014
317920.158774373	4309919.34606742	110010008014004	801	110010008014
317920.158774373	4309969.44269663	110010008014004	801	110010008014
317920.158774373	4310019.53932584	110010008014007	801	110010008014
317920.158774373	4310069.63595506	110010008014007	801	110010008014
317920.158774373	4310119.73258427	110010009022034	902	110010009022
317920.158774373	4310169.82921348	110010009022034	902	110010009022
317920.158774373	4310219.9258427	110010009022034	902	110010009022
317920.158774373	4310270.02247191	110010009022035	902	110010009022
317920.158774373	4310320.11910112	110010009022035	902	110010009022
317920.158774373	4310370.21573034	110010009022035	902	110010009022
317920.158774373	4310420.31235955	110010009021002	902	110010009021
317920.158774373	4310470.40898876	110010009021002	902	110010009021
317920.158774373	4310520.50561798	110010009021002	902	110010009021
317920.158774373	4310570.60224719	110010009021002	902	110010009021
317920.158774373	4310620.6988764	110010009021003	902	110010009021
317920.158774373	4310670.79550562	110010009021006	902	110010009021
317920.158774373	4310720.89213483	110010009021006	902	110010009021
317920.158774373	4310770.98876404	110010009021006	902	110010009021
317920.158774373	4310821.08539326	110010009021006	902	110010009021
317920.158774373	4310871.18202247	110010009021006	902	110010009021
317920.158774373	4310921.27865169	110010009021007	902	110010009021
317920.158774373	4310971.3752809	110010009021001	902	110010009021
317920.158774373	4311021.47191011	110010009021001	902	110010009021
317920.158774373	4311071.56853933	110010009011016	901	110010009011
317920.158774373	4311121.66516854	110010009011016	901	110010009011
317920.158774373	4311171.76179775	110010009011014	901	110010009011
317920.158774373	4311221.85842697	110010009011013	901	110010009011
317920.158774373	4311271.95505618	110010009011013	901	110010009011
317920.158774373	4311322.05168539	110010009011009	901	110010009011
317920.158774373	4311372.14831461	110010009011009	901	110010009011
317920.158774373	4311422.24494382	110010009011008	901	110010009011
317920.158774373	4311472.34157303	110010009011008	901	110010009011
317920.158774373	4311522.43820225	110010009011007	901	110010009011
317920.158774373	4311572.53483146	110010009011007	901	110010009011
317920.158774373	4311622.63146067	110010009011007	901	110010009011
317920.158774373	4311672.72808989	110010009013029	901	110010009013
317920.158774373	4311722.8247191	110010009012023	901	110010009012
317920.158774373	4311772.92134831	110010009012019	901	110010009012
317920.158774373	4311823.01797753	110010009012019	901	110010009012
317920.158774373	4311873.11460674	110010009012020	901	110010009012
317920.158774373	4311923.21123596	110010009012020	901	110010009012
317920.158774373	4311973.30786517	110010009012020	901	110010009012
317920.158774373	4312023.40449438	110010009012020	901	110010009012
317920.158774373	4312073.5011236	110010009012022	901	110010009012
317920.158774373	4312123.59775281	110010009012022	901	110010009012
317920.158774373	4312173.69438202	110010009012022	901	110010009012
317920.158774373	4312223.79101124	110010009012022	901	110010009012
317920.158774373	4312273.88764045	110010009012022	901	110010009012
317920.158774373	4312323.98426966	110010009012016	901	110010009012
317920.158774373	4312374.08089888	110010009012016	901	110010009012
317920.158774373	4312424.17752809	110010009012016	901	110010009012
317920.158774373	4312474.2741573	110010009012012	901	110010009012
317920.158774373	4312524.37078652	110010009012012	901	110010009012
317920.158774373	4312574.46741573	110010009012009	901	110010009012
317920.158774373	4312624.56404494	110010009012009	901	110010009012
317920.158774373	4312674.66067416	110010009012009	901	110010009012
317920.158774373	4312724.75730337	110010009012009	901	110010009012
317920.158774373	4312774.85393258	110010009012011	901	110010009012
317920.158774373	4312824.9505618	110010009012006	901	110010009012
317920.158774373	4312875.04719101	110010009012006	901	110010009012
317920.158774373	4312925.14382022	110010009012018	901	110010009012
317920.158774373	4312975.24044944	110010009012007	901	110010009012
317920.158774373	4313025.33707865	110010009012006	901	110010009012
317920.158774373	4313075.43370786	110010009012006	901	110010009012
317920.158774373	4313125.53033708	110010009012002	901	110010009012
317920.158774373	4313175.62696629	110010009012001	901	110010009012
317970.228412256	4309518.57303371	110010008014008	801	110010008014
317970.228412256	4309568.66966292	110010008014008	801	110010008014
317970.228412256	4309618.76629214	110010008014008	801	110010008014
317970.228412256	4309668.86292135	110010008014008	801	110010008014
317970.228412256	4309718.95955056	110010008014011	801	110010008014
317970.228412256	4309769.05617977	110010008014004	801	110010008014
317970.228412256	4309819.15280899	110010008014004	801	110010008014
317970.228412256	4309869.2494382	110010008014005	801	110010008014
317970.228412256	4309919.34606742	110010008014005	801	110010008014
317970.228412256	4309969.44269663	110010008014004	801	110010008014
317970.228412256	4310019.53932584	110010008014004	801	110010008014
317970.228412256	4310069.63595506	110010008014007	801	110010008014
317970.228412256	4310119.73258427	110010008014007	801	110010008014
317970.228412256	4310169.82921348	110010008014007	801	110010008014
317970.228412256	4310219.9258427	110010009022034	902	110010009022
317970.228412256	4310270.02247191	110010009021002	902	110010009021
317970.228412256	4310320.11910112	110010009021002	902	110010009021
317970.228412256	4310370.21573034	110010009021002	902	110010009021
317970.228412256	4310420.31235955	110010009021002	902	110010009021
317970.228412256	4310470.40898876	110010009021002	902	110010009021
317970.228412256	4310520.50561798	110010009021003	902	110010009021
317970.228412256	4310570.60224719	110010009021003	902	110010009021
317970.228412256	4310620.6988764	110010009021003	902	110010009021
317970.228412256	4310670.79550562	110010009021003	902	110010009021
317970.228412256	4310720.89213483	110010009021005	902	110010009021
317970.228412256	4310770.98876404	110010009021006	902	110010009021
317970.228412256	4310821.08539326	110010009021006	902	110010009021
317970.228412256	4310871.18202247	110010009021006	902	110010009021
317970.228412256	4310921.27865169	110010009021006	902	110010009021
317970.228412256	4310971.3752809	110010009021001	902	110010009021
317970.228412256	4311021.47191011	110010009021001	902	110010009021
317970.228412256	4311071.56853933	110010009021001	902	110010009021
317970.228412256	4311121.66516854	110010009011016	901	110010009011
317970.228412256	4311171.76179775	110010009011014	901	110010009011
317970.228412256	4311221.85842697	110010009011014	901	110010009011
317970.228412256	4311271.95505618	110010009011013	901	110010009011
317970.228412256	4311322.05168539	110010009011009	901	110010009011
317970.228412256	4311372.14831461	110010009011009	901	110010009011
317970.228412256	4311422.24494382	110010009011008	901	110010009011
317970.228412256	4311472.34157303	110010009011008	901	110010009011
317970.228412256	4311522.43820225	110010009011007	901	110010009011
317970.228412256	4311572.53483146	110010009011007	901	110010009011
317970.228412256	4311622.63146067	110010009013029	901	110010009013
317970.228412256	4311672.72808989	110010009013029	901	110010009013
317970.228412256	4311722.8247191	110010009013029	901	110010009013
317970.228412256	4311772.92134831	110010009012019	901	110010009012
317970.228412256	4311823.01797753	110010009012025	901	110010009012
317970.228412256	4311873.11460674	110010009012025	901	110010009012
317970.228412256	4311923.21123596	110010009012025	901	110010009012
317970.228412256	4311973.30786517	110010009012020	901	110010009012
317970.228412256	4312023.40449438	110010009012020	901	110010009012
317970.228412256	4312073.5011236	110010009012020	901	110010009012
317970.228412256	4312123.59775281	110010009012020	901	110010009012
317970.228412256	4312173.69438202	110010009012020	901	110010009012
317970.228412256	4312223.79101124	110010009012022	901	110010009012
317970.228412256	4312273.88764045	110010009012022	901	110010009012
317970.228412256	4312323.98426966	110010009012015	901	110010009012
317970.228412256	4312374.08089888	110010009012015	901	110010009012
317970.228412256	4312424.17752809	110010009012015	901	110010009012
317970.228412256	4312474.2741573	110010009012012	901	110010009012
317970.228412256	4312524.37078652	110010009012012	901	110010009012
317970.228412256	4312574.46741573	110010009012009	901	110010009012
317970.228412256	4312624.56404494	110010009012009	901	110010009012
317970.228412256	4312674.66067416	110010009012006	901	110010009012
317970.228412256	4312724.75730337	110010009012011	901	110010009012
317970.228412256	4312774.85393258	110010009012011	901	110010009012
317970.228412256	4312824.9505618	110010009012006	901	110010009012
317970.228412256	4312875.04719101	110010009012006	901	110010009012
317970.228412256	4312925.14382022	110010009012018	901	110010009012
317970.228412256	4312975.24044944	110010009012007	901	110010009012
317970.228412256	4313025.33707865	110010009012006	901	110010009012
317970.228412256	4313075.43370786	110010009012006	901	110010009012
317970.228412256	4313125.53033708	110010009012002	901	110010009012
317970.228412256	4313175.62696629	110010010013013	1001	110010010013
317970.228412256	4313225.72359551	110010010013006	1001	110010010013
318020.298050139	4309468.47640449	110010008014008	801	110010008014
318020.298050139	4309518.57303371	110010008014008	801	110010008014
318020.298050139	4309568.66966292	110010008014011	801	110010008014
318020.298050139	4309618.76629214	110010008014011	801	110010008014
318020.298050139	4309668.86292135	110010008014011	801	110010008014
318020.298050139	4309718.95955056	110010008014004	801	110010008014
318020.298050139	4309769.05617977	110010008014004	801	110010008014
318020.298050139	4309819.15280899	110010008014004	801	110010008014
318020.298050139	4309869.2494382	110010008014005	801	110010008014
318020.298050139	4309919.34606742	110010008014005	801	110010008014
318020.298050139	4309969.44269663	110010008014005	801	110010008014
318020.298050139	4310019.53932584	110010008014004	801	110010008014
318020.298050139	4310069.63595506	110010008014007	801	110010008014
318020.298050139	4310119.73258427	110010008014007	801	110010008014
318020.298050139	4310169.82921348	110010008014007	801	110010008014
318020.298050139	4310219.9258427	110010008012006	801	110010008012
318020.298050139	4310270.02247191	110010009021002	902	110010009021
318020.298050139	4310320.11910112	110010009021002	902	110010009021
318020.298050139	4310370.21573034	110010009021002	902	110010009021
318020.298050139	4310420.31235955	110010009021002	902	110010009021
318020.298050139	4310470.40898876	110010009021003	902	110010009021
318020.298050139	4310520.50561798	110010009021003	902	110010009021
318020.298050139	4310570.60224719	110010009021003	902	110010009021
318020.298050139	4310620.6988764	110010009021003	902	110010009021
318020.298050139	4310670.79550562	110010009021002	902	110010009021
318020.298050139	4310720.89213483	110010009021004	902	110010009021
318020.298050139	4310770.98876404	110010009021005	902	110010009021
318020.298050139	4310821.08539326	110010009021005	902	110010009021
318020.298050139	4310871.18202247	110010009021006	902	110010009021
318020.298050139	4310921.27865169	110010009021001	902	110010009021
318020.298050139	4310971.3752809	110010009021001	902	110010009021
318020.298050139	4311021.47191011	110010009021001	902	110010009021
318020.298050139	4311071.56853933	110010009021001	902	110010009021
318020.298050139	4311121.66516854	110010009021001	902	110010009021
318020.298050139	4311171.76179775	110010009011014	901	110010009011
318020.298050139	4311221.85842697	110010009011014	901	110010009011
318020.298050139	4311271.95505618	110010009011013	901	110010009011
318020.298050139	4311322.05168539	110010009011009	901	110010009011
318020.298050139	4311372.14831461	110010009011009	901	110010009011
318020.298050139	4311422.24494382	110010009011008	901	110010009011
318020.298050139	4311472.34157303	110010009011008	901	110010009011
318020.298050139	4311522.43820225	110010009013029	901	110010009013
318020.298050139	4311572.53483146	110010009013029	901	110010009013
318020.298050139	4311622.63146067	110010009013029	901	110010009013
318020.298050139	4311672.72808989	110010009013028	901	110010009013
318020.298050139	4311722.8247191	110010009013027	901	110010009013
318020.298050139	4311772.92134831	110010009012025	901	110010009012
318020.298050139	4311823.01797753	110010009012025	901	110010009012
318020.298050139	4311873.11460674	110010009012025	901	110010009012
318020.298050139	4311923.21123596	110010009012025	901	110010009012
318020.298050139	4311973.30786517	110010009012025	901	110010009012
318020.298050139	4312023.40449438	110010009012020	901	110010009012
318020.298050139	4312073.5011236	110010009012020	901	110010009012
318020.298050139	4312123.59775281	110010009012020	901	110010009012
318020.298050139	4312173.69438202	110010009012020	901	110010009012
318020.298050139	4312223.79101124	110010009012020	901	110010009012
318020.298050139	4312273.88764045	110010009012022	901	110010009012
318020.298050139	4312323.98426966	110010009012022	901	110010009012
318020.298050139	4312374.08089888	110010009012015	901	110010009012
318020.298050139	4312424.17752809	110010009012015	901	110010009012
318020.298050139	4312474.2741573	110010009012012	901	110010009012
318020.298050139	4312524.37078652	110010009012012	901	110010009012
318020.298050139	4312574.46741573	110010009012009	901	110010009012
318020.298050139	4312624.56404494	110010009012009	901	110010009012
318020.298050139	4312674.66067416	110010009012006	901	110010009012
318020.298050139	4312724.75730337	110010009012006	901	110010009012
318020.298050139	4312774.85393258	110010009012006	901	110010009012
318020.298050139	4312824.9505618	110010009012006	901	110010009012
318020.298050139	4312875.04719101	110010009012006	901	110010009012
318020.298050139	4312925.14382022	110010009012007	901	110010009012
318020.298050139	4312975.24044944	110010009012006	901	110010009012
318020.298050139	4313025.33707865	110010009012006	901	110010009012
318020.298050139	4313075.43370786	110010009012006	901	110010009012
318020.298050139	4313125.53033708	110010010013013	1001	110010010013
318020.298050139	4313175.62696629	110010010013013	1001	110010010013
318020.298050139	4313225.72359551	110010010013006	1001	110010010013
318020.298050139	4313275.82022472	110010010013006	1001	110010010013
318070.367688022	4309418.37977528	110010008014008	801	110010008014
318070.367688022	4309468.47640449	110010008014011	801	110010008014
318070.367688022	4309518.57303371	110010008014011	801	110010008014
318070.367688022	4309568.66966292	110010008014011	801	110010008014
318070.367688022	4309618.76629214	110010008014011	801	110010008014
318070.367688022	4309668.86292135	110010008014004	801	110010008014
318070.367688022	4309718.95955056	110010008014004	801	110010008014
318070.367688022	4309769.05617977	110010008014004	801	110010008014
318070.367688022	4309819.15280899	110010008014004	801	110010008014
318070.367688022	4309869.2494382	110010008014004	801	110010008014
318070.367688022	4309919.34606742	110010008014005	801	110010008014
318070.367688022	4309969.44269663	110010008014005	801	110010008014
318070.367688022	4310019.53932584	110010008014004	801	110010008014
318070.367688022	4310069.63595506	110010008014004	801	110010008014
318070.367688022	4310119.73258427	110010008012007	801	110010008012
318070.367688022	4310169.82921348	110010008012006	801	110010008012
318070.367688022	4310219.9258427	110010008012006	801	110010008012
318070.367688022	4310270.02247191	110010008012006	801	110010008012
318070.367688022	4310320.11910112	110010009021002	902	110010009021
318070.367688022	4310370.21573034	110010009021002	902	110010009021
318070.367688022	4310420.31235955	110010009021002	902	110010009021
318070.367688022	4310470.40898876	110010009021002	902	110010009021
318070.367688022	4310520.50561798	110010009021002	902	110010009021
318070.367688022	4310570.60224719	110010009021002	902	110010009021
318070.367688022	4310620.6988764	110010009021002	902	110010009021
318070.367688022	4310670.79550562	110010009021002	902	110010009021
318070.367688022	4310720.89213483	110010009021004	902	110010009021
318070.367688022	4310770.98876404	110010009021004	902	110010009021
318070.367688022	4310821.08539326	110010009021005	902	110010009021
318070.367688022	4310871.18202247	110010009021005	902	110010009021
318070.367688022	4310921.27865169	110010009021001	902	110010009021
318070.367688022	4310971.3752809	110010009021001	902	110010009021
318070.367688022	4311021.47191011	110010009021001	902	110010009021
318070.367688022	4311071.56853933	110010009021001	902	110010009021
318070.367688022	4311121.66516854	110010009021001	902	110010009021
318070.367688022	4311171.76179775	110010009021001	902	110010009021
318070.367688022	4311221.85842697	110010009011014	901	110010009011
318070.367688022	4311271.95505618	110010009011014	901	110010009011
318070.367688022	4311322.05168539	110010009011015	901	110010009011
318070.367688022	4311372.14831461	110010009011015	901	110010009011
318070.367688022	4311422.24494382	110010009011008	901	110010009011
318070.367688022	4311472.34157303	110010009013029	901	110010009013
318070.367688022	4311522.43820225	110010009013029	901	110010009013
318070.367688022	4311572.53483146	110010009013029	901	110010009013
318070.367688022	4311622.63146067	110010009013027	901	110010009013
318070.367688022	4311672.72808989	110010009013027	901	110010009013
318070.367688022	4311722.8247191	110010009013027	901	110010009013
318070.367688022	4311772.92134831	110010009012025	901	110010009012
318070.367688022	4311823.01797753	110010009012025	901	110010009012
318070.367688022	4311873.11460674	110010009012025	901	110010009012
318070.367688022	4311923.21123596	110010009012025	901	110010009012
318070.367688022	4311973.30786517	110010009012026	901	110010009012
318070.367688022	4312023.40449438	110010009012026	901	110010009012
318070.367688022	4312073.5011236	110010009012026	901	110010009012
318070.367688022	4312123.59775281	110010009012026	901	110010009012
318070.367688022	4312173.69438202	110010009012021	901	110010009012
318070.367688022	4312223.79101124	110010009012021	901	110010009012
318070.367688022	4312273.88764045	110010009012022	901	110010009012
318070.367688022	4312323.98426966	110010009012022	901	110010009012
318070.367688022	4312374.08089888	110010009012015	901	110010009012
318070.367688022	4312424.17752809	110010009012015	901	110010009012
318070.367688022	4312474.2741573	110010009012012	901	110010009012
318070.367688022	4312524.37078652	110010009012012	901	110010009012
318070.367688022	4312574.46741573	110010009012009	901	110010009012
318070.367688022	4312624.56404494	110010009012009	901	110010009012
318070.367688022	4312674.66067416	110010009012009	901	110010009012
318070.367688022	4312724.75730337	110010009012006	901	110010009012
318070.367688022	4312774.85393258	110010009012006	901	110010009012
318070.367688022	4312824.9505618	110010009012006	901	110010009012
318070.367688022	4312875.04719101	110010009012006	901	110010009012
318070.367688022	4312925.14382022	110010009012006	901	110010009012
318070.367688022	4312975.24044944	110010009012006	901	110010009012
318070.367688022	4313025.33707865	110010009012006	901	110010009012
318070.367688022	4313075.43370786	110010010016004	1001	110010010016
318070.367688022	4313125.53033708	110010010013013	1001	110010010013
318070.367688022	4313175.62696629	110010010013013	1001	110010010013
318070.367688022	4313225.72359551	110010010013006	1001	110010010013
318070.367688022	4313275.82022472	110010010013006	1001	110010010013
318070.367688022	4313325.91685393	110010010013005	1001	110010010013
318120.437325905	4309318.18651685	110010008014011	801	110010008014
318120.437325905	4309368.28314607	110010008014011	801	110010008014
318120.437325905	4309418.37977528	110010008014011	801	110010008014
318120.437325905	4309468.47640449	110010008014011	801	110010008014
318120.437325905	4309518.57303371	110010008014011	801	110010008014
318120.437325905	4309568.66966292	110010008014011	801	110010008014
318120.437325905	4309618.76629214	110010008014004	801	110010008014
318120.437325905	4309668.86292135	110010008014004	801	110010008014
318120.437325905	4309718.95955056	110010008014004	801	110010008014
318120.437325905	4309769.05617977	110010008014004	801	110010008014
318120.437325905	4309819.15280899	110010008014003	801	110010008014
318120.437325905	4309869.2494382	110010008014003	801	110010008014
318120.437325905	4309919.34606742	110010008012014	801	110010008012
318120.437325905	4309969.44269663	110010008012014	801	110010008012
318120.437325905	4310019.53932584	110010008012007	801	110010008012
318120.437325905	4310069.63595506	110010008012007	801	110010008012
318120.437325905	4310119.73258427	110010008012007	801	110010008012
318120.437325905	4310169.82921348	110010008012007	801	110010008012
318120.437325905	4310219.9258427	110010008012007	801	110010008012
318120.437325905	4310270.02247191	110010008012006	801	110010008012
318120.437325905	4310320.11910112	110010008012006	801	110010008012
318120.437325905	4310370.21573034	110010009021002	902	110010009021
318120.437325905	4310420.31235955	110010009021002	902	110010009021
318120.437325905	4310470.40898876	110010009021002	902	110010009021
318120.437325905	4310520.50561798	110010009021002	902	110010009021
318120.437325905	4310570.60224719	110010009021002	902	110010009021
318120.437325905	4310620.6988764	110010009021002	902	110010009021
318120.437325905	4310670.79550562	110010009021002	902	110010009021
318120.437325905	4310720.89213483	110010009021000	902	110010009021
318120.437325905	4310770.98876404	110010009021000	902	110010009021
318120.437325905	4310821.08539326	110010009021004	902	110010009021
318120.437325905	4310871.18202247	110010009021001	902	110010009021
318120.437325905	4310921.27865169	110010009021001	902	110010009021
318120.437325905	4310971.3752809	110010009021001	902	110010009021
318120.437325905	4311021.47191011	110010009021001	902	110010009021
318120.437325905	4311071.56853933	110010009021001	902	110010009021
318120.437325905	4311121.66516854	110010009021001	902	110010009021
318120.437325905	4311171.76179775	110010009021001	902	110010009021
318120.437325905	4311221.85842697	110010009021001	902	110010009021
318120.437325905	4311271.95505618	110010009011015	901	110010009011
318120.437325905	4311322.05168539	110010009011015	901	110010009011
318120.437325905	4311372.14831461	110010009011015	901	110010009011
318120.437325905	4311422.24494382	110010009011008	901	110010009011
318120.437325905	4311472.34157303	110010009013029	901	110010009013
318120.437325905	4311522.43820225	110010009013029	901	110010009013
318120.437325905	4311572.53483146	110010009013027	901	110010009013
318120.437325905	4311622.63146067	110010009013027	901	110010009013
318120.437325905	4311672.72808989	110010009013027	901	110010009013
318120.437325905	4311722.8247191	110010009013026	901	110010009013
318120.437325905	4311772.92134831	110010009012025	901	110010009012
318120.437325905	4311823.01797753	110010009012025	901	110010009012
318120.437325905	4311873.11460674	110010009012025	901	110010009012
318120.437325905	4311923.21123596	110010009012025	901	110010009012
318120.437325905	4311973.30786517	110010009012025	901	110010009012
318120.437325905	4312023.40449438	110010009012026	901	110010009012
318120.437325905	4312073.5011236	110010009012026	901	110010009012
318120.437325905	4312123.59775281	110010009012026	901	110010009012
318120.437325905	4312173.69438202	110010009012021	901	110010009012
318120.437325905	4312223.79101124	110010009012021	901	110010009012
318120.437325905	4312273.88764045	110010009012021	901	110010009012
318120.437325905	4312323.98426966	110010009012021	901	110010009012
318120.437325905	4312374.08089888	110010009012014	901	110010009012
318120.437325905	4312424.17752809	110010009012014	901	110010009012
318120.437325905	4312474.2741573	110010009012012	901	110010009012
318120.437325905	4312524.37078652	110010009012012	901	110010009012
318120.437325905	4312574.46741573	110010009012010	901	110010009012
318120.437325905	4312624.56404494	110010009012010	901	110010009012
318120.437325905	4312674.66067416	110010009012009	901	110010009012
318120.437325905	4312724.75730337	110010009012009	901	110010009012
318120.437325905	4312774.85393258	110010009012006	901	110010009012
318120.437325905	4312824.9505618	110010009012006	901	110010009012
318120.437325905	4312875.04719101	110010009012006	901	110010009012
318120.437325905	4312925.14382022	110010009012006	901	110010009012
318120.437325905	4312975.24044944	110010009012006	901	110010009012
318120.437325905	4313025.33707865	110010010016004	1001	110010010016
318120.437325905	4313075.43370786	110010010016004	1001	110010010016
318120.437325905	4313125.53033708	110010010013013	1001	110010010013
318120.437325905	4313175.62696629	110010010013013	1001	110010010013
318120.437325905	4313225.72359551	110010010013006	1001	110010010013
318120.437325905	4313275.82022472	110010010013006	1001	110010010013
318120.437325905	4313325.91685393	110010010013005	1001	110010010013
318120.437325905	4313376.01348315	110010010013005	1001	110010010013
318170.506963788	4309217.99325843	110010008021002	802	110010008021
318170.506963788	4309268.08988764	110010008021002	802	110010008021
318170.506963788	4309318.18651685	110010008014011	801	110010008014
318170.506963788	4309368.28314607	110010008014011	801	110010008014
318170.506963788	4309418.37977528	110010008014011	801	110010008014
318170.506963788	4309468.47640449	110010008014011	801	110010008014
318170.506963788	4309518.57303371	110010008014011	801	110010008014
318170.506963788	4309568.66966292	110010008014011	801	110010008014
318170.506963788	4309618.76629214	110010008014004	801	110010008014
318170.506963788	4309668.86292135	110010008014004	801	110010008014
318170.506963788	4309718.95955056	110010008014004	801	110010008014
318170.506963788	4309769.05617977	110010008014006	801	110010008014
318170.506963788	4309819.15280899	110010008014003	801	110010008014
318170.506963788	4309869.2494382	110010008014003	801	110010008014
318170.506963788	4309919.34606742	110010008012014	801	110010008012
318170.506963788	4309969.44269663	110010008012014	801	110010008012
318170.506963788	4310019.53932584	110010008012007	801	110010008012
318170.506963788	4310069.63595506	110010008012007	801	110010008012
318170.506963788	4310119.73258427	110010008012007	801	110010008012
318170.506963788	4310169.82921348	110010008012007	801	110010008012
318170.506963788	4310219.9258427	110010008012007	801	110010008012
318170.506963788	4310270.02247191	110010008012007	801	110010008012
318170.506963788	4310320.11910112	110010008012007	801	110010008012
318170.506963788	4310370.21573034	110010008012006	801	110010008012
318170.506963788	4310420.31235955	110010008012006	801	110010008012
318170.506963788	4310470.40898876	110010009021002	902	110010009021
318170.506963788	4310520.50561798	110010009021002	902	110010009021
318170.506963788	4310570.60224719	110010009021002	902	110010009021
318170.506963788	4310620.6988764	110010009021000	902	110010009021
318170.506963788	4310670.79550562	110010009021000	902	110010009021
318170.506963788	4310720.89213483	110010009021000	902	110010009021
318170.506963788	4310770.98876404	110010009021000	902	110010009021
318170.506963788	4310821.08539326	110010009021000	902	110010009021
318170.506963788	4310871.18202247	110010009021000	902	110010009021
318170.506963788	4310921.27865169	110010009021000	902	110010009021
318170.506963788	4310971.3752809	110010009021001	902	110010009021
318170.506963788	4311021.47191011	110010009021001	902	110010009021
318170.506963788	4311071.56853933	110010009021001	902	110010009021
318170.506963788	4311121.66516854	110010009021001	902	110010009021
318170.506963788	4311171.76179775	110010009021001	902	110010009021
318170.506963788	4311221.85842697	110010009021001	902	110010009021
318170.506963788	4311271.95505618	110010009021001	902	110010009021
318170.506963788	4311322.05168539	110010009011015	901	110010009011
318170.506963788	4311372.14831461	110010009011015	901	110010009011
318170.506963788	4311422.24494382	110010009013029	901	110010009013
318170.506963788	4311472.34157303	110010009013029	901	110010009013
318170.506963788	4311522.43820225	110010009013029	901	110010009013
318170.506963788	4311572.53483146	110010009013027	901	110010009013
318170.506963788	4311622.63146067	110010009013027	901	110010009013
318170.506963788	4311672.72808989	110010009013026	901	110010009013
318170.506963788	4311722.8247191	110010009013026	901	110010009013
318170.506963788	4311772.92134831	110010009012025	901	110010009012
318170.506963788	4311823.01797753	110010009012025	901	110010009012
318170.506963788	4311873.11460674	110010009012025	901	110010009012
318170.506963788	4311923.21123596	110010009012025	901	110010009012
318170.506963788	4311973.30786517	110010009012025	901	110010009012
318170.506963788	4312023.40449438	110010009012026	901	110010009012
318170.506963788	4312073.5011236	110010009012026	901	110010009012
318170.506963788	4312123.59775281	110010009012026	901	110010009012
318170.506963788	4312173.69438202	110010009012021	901	110010009012
318170.506963788	4312223.79101124	110010009012021	901	110010009012
318170.506963788	4312273.88764045	110010009012021	901	110010009012
318170.506963788	4312323.98426966	110010009012021	901	110010009012
318170.506963788	4312374.08089888	110010009012014	901	110010009012
318170.506963788	4312424.17752809	110010009012014	901	110010009012
318170.506963788	4312474.2741573	110010009012013	901	110010009012
318170.506963788	4312524.37078652	110010009012013	901	110010009012
318170.506963788	4312574.46741573	110010009013003	901	110010009013
318170.506963788	4312624.56404494	110010009012010	901	110010009012
318170.506963788	4312674.66067416	110010009012010	901	110010009012
318170.506963788	4312724.75730337	110010009012009	901	110010009012
318170.506963788	4312774.85393258	110010009012009	901	110010009012
318170.506963788	4312824.9505618	110010009012009	901	110010009012
318170.506963788	4312875.04719101	110010009012009	901	110010009012
318170.506963788	4312925.14382022	110010009012008	901	110010009012
318170.506963788	4312975.24044944	110010010016004	1001	110010010016
318170.506963788	4313025.33707865	110010010016004	1001	110010010016
318170.506963788	4313075.43370786	110010010016004	1001	110010010016
318170.506963788	4313125.53033708	110010010013013	1001	110010010013
318170.506963788	4313175.62696629	110010010013013	1001	110010010013
318170.506963788	4313225.72359551	110010010013006	1001	110010010013
318170.506963788	4313275.82022472	110010010013006	1001	110010010013
318170.506963788	4313325.91685393	110010010013005	1001	110010010013
318170.506963788	4313376.01348315	110010010013005	1001	110010010013
318170.506963788	4313426.11011236	110010010013005	1001	110010010013
318220.576601671	4309167.89662921	110010008021002	802	110010008021
318220.576601671	4309217.99325843	110010008021002	802	110010008021
318220.576601671	4309268.08988764	110010008021002	802	110010008021
318220.576601671	4309318.18651685	110010008014011	801	110010008014
318220.576601671	4309368.28314607	110010008014011	801	110010008014
318220.576601671	4309418.37977528	110010008014011	801	110010008014
318220.576601671	4309468.47640449	110010008014011	801	110010008014
318220.576601671	4309518.57303371	110010008014011	801	110010008014
318220.576601671	4309568.66966292	110010008014004	801	110010008014
318220.576601671	4309618.76629214	110010008014004	801	110010008014
318220.576601671	4309668.86292135	110010008014004	801	110010008014
318220.576601671	4309718.95955056	110010008014006	801	110010008014
318220.576601671	4309769.05617977	110010008014006	801	110010008014
318220.576601671	4309819.15280899	110010008014002	801	110010008014
318220.576601671	4309869.2494382	110010008014003	801	110010008014
318220.576601671	4309919.34606742	110010008012014	801	110010008012
318220.576601671	4309969.44269663	110010008012014	801	110010008012
318220.576601671	4310019.53932584	110010008012007	801	110010008012
318220.576601671	4310069.63595506	110010008012007	801	110010008012
318220.576601671	4310119.73258427	110010008012007	801	110010008012
318220.576601671	4310169.82921348	110010008012007	801	110010008012
318220.576601671	4310219.9258427	110010008012007	801	110010008012
318220.576601671	4310270.02247191	110010008012007	801	110010008012
318220.576601671	4310320.11910112	110010008012007	801	110010008012
318220.576601671	4310370.21573034	110010008012007	801	110010008012
318220.576601671	4310420.31235955	110010008012007	801	110010008012
318220.576601671	4310470.40898876	110010008012006	801	110010008012
318220.576601671	4310570.60224719	110010009021000	902	110010009021
318220.576601671	4310620.6988764	110010009021000	902	110010009021
318220.576601671	4310670.79550562	110010009021000	902	110010009021
318220.576601671	4310720.89213483	110010009021000	902	110010009021
318220.576601671	4310770.98876404	110010009021000	902	110010009021
318220.576601671	4310821.08539326	110010009021000	902	110010009021
318220.576601671	4310871.18202247	110010009021000	902	110010009021
318220.576601671	4310921.27865169	110010009021000	902	110010009021
318220.576601671	4310971.3752809	110010009021000	902	110010009021
318220.576601671	4311021.47191011	110010009021000	902	110010009021
318220.576601671	4311071.56853933	110010009021000	902	110010009021
318220.576601671	4311121.66516854	110010009021000	902	110010009021
318220.576601671	4311171.76179775	110010009021000	902	110010009021
318220.576601671	4311221.85842697	110010009021001	902	110010009021
318220.576601671	4311271.95505618	110010009021001	902	110010009021
318220.576601671	4311322.05168539	110010009021001	902	110010009021
318220.576601671	4311372.14831461	110010009021001	902	110010009021
318220.576601671	4311422.24494382	110010009013029	901	110010009013
318220.576601671	4311472.34157303	110010009013029	901	110010009013
318220.576601671	4311522.43820225	110010009013027	901	110010009013
318220.576601671	4311572.53483146	110010009013027	901	110010009013
318220.576601671	4311622.63146067	110010009013026	901	110010009013
318220.576601671	4311672.72808989	110010009013026	901	110010009013
318220.576601671	4311722.8247191	110010009013026	901	110010009013
318220.576601671	4311772.92134831	110010009012025	901	110010009012
318220.576601671	4311823.01797753	110010009012025	901	110010009012
318220.576601671	4311873.11460674	110010009012025	901	110010009012
318220.576601671	4311923.21123596	110010009012025	901	110010009012
318220.576601671	4311973.30786517	110010009012025	901	110010009012
318220.576601671	4312023.40449438	110010009012025	901	110010009012
318220.576601671	4312073.5011236	110010009012026	901	110010009012
318220.576601671	4312123.59775281	110010009012026	901	110010009012
318220.576601671	4312173.69438202	110010009012021	901	110010009012
318220.576601671	4312223.79101124	110010009012021	901	110010009012
318220.576601671	4312273.88764045	110010009012021	901	110010009012
318220.576601671	4312323.98426966	110010009012021	901	110010009012
318220.576601671	4312374.08089888	110010009012014	901	110010009012
318220.576601671	4312424.17752809	110010009012014	901	110010009012
318220.576601671	4312474.2741573	110010009012013	901	110010009012
318220.576601671	4312524.37078652	110010009012013	901	110010009012
318220.576601671	4312574.46741573	110010009013003	901	110010009013
318220.576601671	4312624.56404494	110010009013003	901	110010009013
318220.576601671	4312674.66067416	110010009012009	901	110010009012
318220.576601671	4312724.75730337	110010009012009	901	110010009012
318220.576601671	4312774.85393258	110010009012009	901	110010009012
318220.576601671	4312824.9505618	110010009012009	901	110010009012
318220.576601671	4312875.04719101	110010009012009	901	110010009012
318220.576601671	4312925.14382022	110010009012008	901	110010009012
318220.576601671	4312975.24044944	110010010016004	1001	110010010016
318220.576601671	4313025.33707865	110010010016004	1001	110010010016
318220.576601671	4313075.43370786	110010010016004	1001	110010010016
318220.576601671	4313125.53033708	110010010013013	1001	110010010013
318220.576601671	4313175.62696629	110010010013013	1001	110010010013
318220.576601671	4313225.72359551	110010010013006	1001	110010010013
318220.576601671	4313275.82022472	110010010013006	1001	110010010013
318220.576601671	4313325.91685393	110010010013005	1001	110010010013
318220.576601671	4313376.01348315	110010010013005	1001	110010010013
318220.576601671	4313426.11011236	110010010013005	1001	110010010013
318270.646239554	4309067.70337079	110010008021002	802	110010008021
318270.646239554	4309117.8	110010008021002	802	110010008021
318270.646239554	4309167.89662921	110010008021002	802	110010008021
318270.646239554	4309217.99325843	110010008021002	802	110010008021
318270.646239554	4309268.08988764	110010008021002	802	110010008021
318270.646239554	4309318.18651685	110010008021005	802	110010008021
318270.646239554	4309368.28314607	110010008021005	802	110010008021
318270.646239554	4309418.37977528	110010008014011	801	110010008014
318270.646239554	4309468.47640449	110010008014011	801	110010008014
318270.646239554	4309518.57303371	110010008014011	801	110010008014
318270.646239554	4309568.66966292	110010008014004	801	110010008014
318270.646239554	4309618.76629214	110010008014004	801	110010008014
318270.646239554	4309668.86292135	110010008014014	801	110010008014
318270.646239554	4309718.95955056	110010008014014	801	110010008014
318270.646239554	4309769.05617977	110010008014006	801	110010008014
318270.646239554	4309819.15280899	110010008014002	801	110010008014
318270.646239554	4309869.2494382	110010008014002	801	110010008014
318270.646239554	4309919.34606742	110010008012015	801	110010008012
318270.646239554	4309969.44269663	110010008012015	801	110010008012
318270.646239554	4310019.53932584	110010008012015	801	110010008012
318270.646239554	4310069.63595506	110010008012015	801	110010008012
318270.646239554	4310119.73258427	110010008012015	801	110010008012
318270.646239554	4310169.82921348	110010008012015	801	110010008012
318270.646239554	4310219.9258427	110010008012015	801	110010008012
318270.646239554	4310270.02247191	110010008012015	801	110010008012
318270.646239554	4310320.11910112	110010008012007	801	110010008012
318270.646239554	4310370.21573034	110010008012007	801	110010008012
318270.646239554	4310420.31235955	110010008012007	801	110010008012
318270.646239554	4310470.40898876	110010008012007	801	110010008012
318270.646239554	4310520.50561798	110010008012007	801	110010008012
318270.646239554	4310670.79550562	110010009021000	902	110010009021
318270.646239554	4310720.89213483	110010009021000	902	110010009021
318270.646239554	4310770.98876404	110010009021000	902	110010009021
318270.646239554	4310821.08539326	110010009021000	902	110010009021
318270.646239554	4310871.18202247	110010009021000	902	110010009021
318270.646239554	4310921.27865169	110010009021000	902	110010009021
318270.646239554	4310971.3752809	110010009021000	902	110010009021
318270.646239554	4311021.47191011	110010009021000	902	110010009021
318270.646239554	4311071.56853933	110010009021000	902	110010009021
318270.646239554	4311121.66516854	110010009021000	902	110010009021
318270.646239554	4311171.76179775	110010009021000	902	110010009021
318270.646239554	4311221.85842697	110010009021000	902	110010009021
318270.646239554	4311271.95505618	110010009021000	902	110010009021
318270.646239554	4311322.05168539	110010009021001	902	110010009021
318270.646239554	4311372.14831461	110010009013029	901	110010009013
318270.646239554	4311422.24494382	110010009013029	901	110010009013
318270.646239554	4311472.34157303	110010009013029	901	110010009013
318270.646239554	4311522.43820225	110010009013027	901	110010009013
318270.646239554	4311572.53483146	110010009013027	901	110010009013
318270.646239554	4311622.63146067	110010009013026	901	110010009013
318270.646239554	4311672.72808989	110010009013026	901	110010009013
318270.646239554	4311722.8247191	110010009013026	901	110010009013
318270.646239554	4311772.92134831	110010009012025	901	110010009012
318270.646239554	4311823.01797753	110010009012025	901	110010009012
318270.646239554	4311873.11460674	110010009012025	901	110010009012
318270.646239554	4311923.21123596	110010009012025	901	110010009012
318270.646239554	4311973.30786517	110010009012025	901	110010009012
318270.646239554	4312023.40449438	110010009012025	901	110010009012
318270.646239554	4312073.5011236	110010009012026	901	110010009012
318270.646239554	4312123.59775281	110010009012026	901	110010009012
318270.646239554	4312173.69438202	110010009012021	901	110010009012
318270.646239554	4312223.79101124	110010009012021	901	110010009012
318270.646239554	4312273.88764045	110010009012021	901	110010009012
318270.646239554	4312323.98426966	110010009012021	901	110010009012
318270.646239554	4312374.08089888	110010009012014	901	110010009012
318270.646239554	4312424.17752809	110010009012014	901	110010009012
318270.646239554	4312474.2741573	110010009012013	901	110010009012
318270.646239554	4312524.37078652	110010009012013	901	110010009012
318270.646239554	4312574.46741573	110010009013003	901	110010009013
318270.646239554	4312624.56404494	110010009013003	901	110010009013
318270.646239554	4312674.66067416	110010009013003	901	110010009013
318270.646239554	4312724.75730337	110010009012009	901	110010009012
318270.646239554	4312774.85393258	110010009012009	901	110010009012
318270.646239554	4312824.9505618	110010009012009	901	110010009012
318270.646239554	4312875.04719101	110010009012009	901	110010009012
318270.646239554	4312925.14382022	110010010016004	1001	110010010016
318270.646239554	4312975.24044944	110010010016004	1001	110010010016
318270.646239554	4313025.33707865	110010010016004	1001	110010010016
318270.646239554	4313075.43370786	110010010016004	1001	110010010016
318270.646239554	4313125.53033708	110010010013013	1001	110010010013
318270.646239554	4313175.62696629	110010010013013	1001	110010010013
318270.646239554	4313225.72359551	110010010013006	1001	110010010013
318270.646239554	4313275.82022472	110010010013006	1001	110010010013
318270.646239554	4313325.91685393	110010010013005	1001	110010010013
318270.646239554	4313376.01348315	110010010013005	1001	110010010013
318270.646239554	4313426.11011236	110010010013005	1001	110010010013
318270.646239554	4313476.20674157	110010010015016	1001	110010010015
318320.715877437	4309017.60674157	110010008021002	802	110010008021
318320.715877437	4309067.70337079	110010008021002	802	110010008021
318320.715877437	4309117.8	110010008021002	802	110010008021
318320.715877437	4309167.89662921	110010008021002	802	110010008021
318320.715877437	4309217.99325843	110010008021005	802	110010008021
318320.715877437	4309268.08988764	110010008021005	802	110010008021
318320.715877437	4309318.18651685	110010008021005	802	110010008021
318320.715877437	4309368.28314607	110010008021005	802	110010008021
318320.715877437	4309418.37977528	110010008021005	802	110010008021
318320.715877437	4309468.47640449	110010008014011	801	110010008014
318320.715877437	4309518.57303371	110010008014011	801	110010008014
318320.715877437	4309568.66966292	110010008014004	801	110010008014
318320.715877437	4309618.76629214	110010008014000	801	110010008014
318320.715877437	4309668.86292135	110010008014014	801	110010008014
318320.715877437	4309718.95955056	110010008014014	801	110010008014
318320.715877437	4309769.05617977	110010008014014	801	110010008014
318320.715877437	4309819.15280899	110010008014002	801	110010008014
318320.715877437	4309869.2494382	110010008014002	801	110010008014
318320.715877437	4309919.34606742	110010008012015	801	110010008012
318320.715877437	4309969.44269663	110010008012015	801	110010008012
318320.715877437	4310019.53932584	110010008012015	801	110010008012
318320.715877437	4310069.63595506	110010008012015	801	110010008012
318320.715877437	4310119.73258427	110010008012015	801	110010008012
318320.715877437	4310169.82921348	110010008012015	801	110010008012
318320.715877437	4310219.9258427	110010008012015	801	110010008012
318320.715877437	4310270.02247191	110010008012015	801	110010008012
318320.715877437	4310320.11910112	110010008012008	801	110010008012
318320.715877437	4310370.21573034	110010008012007	801	110010008012
318320.715877437	4310420.31235955	110010008012007	801	110010008012
318320.715877437	4310470.40898876	110010008012007	801	110010008012
318320.715877437	4310520.50561798	110010008012007	801	110010008012
318320.715877437	4310570.60224719	110010008012007	801	110010008012
318320.715877437	4310620.6988764	110010008012007	801	110010008012
318320.715877437	4310670.79550562	110010008012000	801	110010008012
318320.715877437	4310720.89213483	110010009021000	902	110010009021
318320.715877437	4310770.98876404	110010009021000	902	110010009021
318320.715877437	4310821.08539326	110010009021000	902	110010009021
318320.715877437	4310871.18202247	110010009021000	902	110010009021
318320.715877437	4310921.27865169	110010009021000	902	110010009021
318320.715877437	4310971.3752809	110010009021000	902	110010009021
318320.715877437	4311021.47191011	110010008012000	801	110010008012
318320.715877437	4311071.56853933	110010008012000	801	110010008012
318320.715877437	4311121.66516854	110010008012001	801	110010008012
318320.715877437	4311171.76179775	110010008012001	801	110010008012
318320.715877437	4311221.85842697	110010009021000	902	110010009021
318320.715877437	4311271.95505618	110010009021000	902	110010009021
318320.715877437	4311322.05168539	110010009021000	902	110010009021
318320.715877437	4311372.14831461	110010009013029	901	110010009013
318320.715877437	4311422.24494382	110010009013029	901	110010009013
318320.715877437	4311472.34157303	110010009013027	901	110010009013
318320.715877437	4311522.43820225	110010009013027	901	110010009013
318320.715877437	4311572.53483146	110010009013027	901	110010009013
318320.715877437	4311622.63146067	110010009013026	901	110010009013
318320.715877437	4311672.72808989	110010009013026	901	110010009013
318320.715877437	4311722.8247191	110010009013026	901	110010009013
318320.715877437	4311772.92134831	110010009012025	901	110010009012
318320.715877437	4311823.01797753	110010009013011	901	110010009013
318320.715877437	4311873.11460674	110010009013011	901	110010009013
318320.715877437	4311923.21123596	110010009013011	901	110010009013
318320.715877437	4311973.30786517	110010009013011	901	110010009013
318320.715877437	4312023.40449438	110010009013011	901	110010009013
318320.715877437	4312073.5011236	110010009013019	901	110010009013
318320.715877437	4312123.59775281	110010009013019	901	110010009013
318320.715877437	4312173.69438202	110010009013017	901	110010009013
318320.715877437	4312223.79101124	110010009013017	901	110010009013
318320.715877437	4312273.88764045	110010009013016	901	110010009013
318320.715877437	4312323.98426966	110010009013016	901	110010009013
318320.715877437	4312374.08089888	110010009013006	901	110010009013
318320.715877437	4312424.17752809	110010009013006	901	110010009013
318320.715877437	4312474.2741573	110010009013005	901	110010009013
318320.715877437	4312524.37078652	110010009013005	901	110010009013
318320.715877437	4312574.46741573	110010009013002	901	110010009013
318320.715877437	4312624.56404494	110010009013002	901	110010009013
318320.715877437	4312674.66067416	110010009013002	901	110010009013
318320.715877437	4312724.75730337	110010009013000	901	110010009013
318320.715877437	4312774.85393258	110010009013000	901	110010009013
318320.715877437	4312824.9505618	110010009013000	901	110010009013
318320.715877437	4312875.04719101	110010010016006	1001	110010010016
318320.715877437	4312925.14382022	110010010016009	1001	110010010016
318320.715877437	4312975.24044944	110010010016009	1001	110010010016
318320.715877437	4313025.33707865	110010010016003	1001	110010010016
318320.715877437	4313075.43370786	110010010016003	1001	110010010016
318320.715877437	4313125.53033708	110010010013012	1001	110010010013
318320.715877437	4313175.62696629	110010010013012	1001	110010010013
318320.715877437	4313225.72359551	110010010013007	1001	110010010013
318320.715877437	4313275.82022472	110010010013007	1001	110010010013
318320.715877437	4313325.91685393	110010010013004	1001	110010010013
318320.715877437	4313376.01348315	110010010013004	1001	110010010013
318320.715877437	4313426.11011236	110010010013004	1001	110010010013
318320.715877437	4313476.20674157	110010010015015	1001	110010010015
318320.715877437	4313526.30337079	110010010015015	1001	110010010015
318370.78551532	4308967.51011236	110010008021002	802	110010008021
318370.78551532	4309017.60674157	110010008021002	802	110010008021
318370.78551532	4309067.70337079	110010008021002	802	110010008021
318370.78551532	4309117.8	110010008021002	802	110010008021
318370.78551532	4309167.89662921	110010008021005	802	110010008021
318370.78551532	4309217.99325843	110010008021005	802	110010008021
318370.78551532	4309268.08988764	110010008021005	802	110010008021
318370.78551532	4309318.18651685	110010008021005	802	110010008021
318370.78551532	4309368.28314607	110010008021005	802	110010008021
318370.78551532	4309418.37977528	110010008021005	802	110010008021
318370.78551532	4309468.47640449	110010008021002	802	110010008021
318370.78551532	4309518.57303371	110010008014004	801	110010008014
318370.78551532	4309568.66966292	110010008014000	801	110010008014
318370.78551532	4309618.76629214	110010008014000	801	110010008014
318370.78551532	4309668.86292135	110010008014014	801	110010008014
318370.78551532	4309718.95955056	110010008014014	801	110010008014
318370.78551532	4309769.05617977	110010008014014	801	110010008014
318370.78551532	4309819.15280899	110010008014002	801	110010008014
318370.78551532	4309869.2494382	110010008014002	801	110010008014
318370.78551532	4309919.34606742	110010008012011	801	110010008012
318370.78551532	4309969.44269663	110010008012011	801	110010008012
318370.78551532	4310019.53932584	110010008012011	801	110010008012
318370.78551532	4310069.63595506	110010008012011	801	110010008012
318370.78551532	4310119.73258427	110010008012011	801	110010008012
318370.78551532	4310169.82921348	110010008012011	801	110010008012
318370.78551532	4310219.9258427	110010008012011	801	110010008012
318370.78551532	4310270.02247191	110010008012011	801	110010008012
318370.78551532	4310320.11910112	110010008012008	801	110010008012
318370.78551532	4310370.21573034	110010008012008	801	110010008012
318370.78551532	4310420.31235955	110010008012007	801	110010008012
318370.78551532	4310470.40898876	110010008012007	801	110010008012
318370.78551532	4310520.50561798	110010008012007	801	110010008012
318370.78551532	4310570.60224719	110010008012007	801	110010008012
318370.78551532	4310620.6988764	110010008012007	801	110010008012
318370.78551532	4310670.79550562	110010008012002	801	110010008012
318370.78551532	4310720.89213483	110010008012002	801	110010008012
318370.78551532	4310770.98876404	110010008012000	801	110010008012
318370.78551532	4310821.08539326	110010008012000	801	110010008012
318370.78551532	4310871.18202247	110010008012000	801	110010008012
318370.78551532	4310921.27865169	110010008012000	801	110010008012
318370.78551532	4310971.3752809	110010008012000	801	110010008012
318370.78551532	4311021.47191011	110010008012000	801	110010008012
318370.78551532	4311071.56853933	110010008012000	801	110010008012
318370.78551532	4311121.66516854	110010008012000	801	110010008012
318370.78551532	4311171.76179775	110010008012001	801	110010008012
318370.78551532	4311221.85842697	110010008012001	801	110010008012
318370.78551532	4311271.95505618	110010009021000	902	110010009021
318370.78551532	4311322.05168539	110010009021000	902	110010009021
318370.78551532	4311372.14831461	110010009013029	901	110010009013
318370.78551532	4311422.24494382	110010009013029	901	110010009013
318370.78551532	4311472.34157303	110010009013027	901	110010009013
318370.78551532	4311522.43820225	110010009013027	901	110010009013
318370.78551532	4311572.53483146	110010009013027	901	110010009013
318370.78551532	4311622.63146067	110010009013026	901	110010009013
318370.78551532	4311672.72808989	110010009013026	901	110010009013
318370.78551532	4311722.8247191	110010009013026	901	110010009013
318370.78551532	4311772.92134831	110010009013011	901	110010009013
318370.78551532	4311823.01797753	110010009013011	901	110010009013
318370.78551532	4311873.11460674	110010009013011	901	110010009013
318370.78551532	4311923.21123596	110010009013011	901	110010009013
318370.78551532	4311973.30786517	110010009013011	901	110010009013
318370.78551532	4312023.40449438	110010009013011	901	110010009013
318370.78551532	4312073.5011236	110010009013019	901	110010009013
318370.78551532	4312123.59775281	110010009013019	901	110010009013
318370.78551532	4312173.69438202	110010009013017	901	110010009013
318370.78551532	4312223.79101124	110010009013017	901	110010009013
318370.78551532	4312273.88764045	110010009013016	901	110010009013
318370.78551532	4312323.98426966	110010009013016	901	110010009013
318370.78551532	4312374.08089888	110010009013006	901	110010009013
318370.78551532	4312424.17752809	110010009013006	901	110010009013
318370.78551532	4312474.2741573	110010009013005	901	110010009013
318370.78551532	4312524.37078652	110010009013005	901	110010009013
318370.78551532	4312574.46741573	110010009013002	901	110010009013
318370.78551532	4312624.56404494	110010009013002	901	110010009013
318370.78551532	4312674.66067416	110010009013002	901	110010009013
318370.78551532	4312724.75730337	110010009013000	901	110010009013
318370.78551532	4312774.85393258	110010009013000	901	110010009013
318370.78551532	4312824.9505618	110010010016006	1001	110010010016
318370.78551532	4312875.04719101	110010010016006	1001	110010010016
318370.78551532	4312925.14382022	110010010016009	1001	110010010016
318370.78551532	4312975.24044944	110010010016009	1001	110010010016
318370.78551532	4313025.33707865	110010010016003	1001	110010010016
318370.78551532	4313075.43370786	110010010016003	1001	110010010016
318370.78551532	4313125.53033708	110010010013012	1001	110010010013
318370.78551532	4313175.62696629	110010010013012	1001	110010010013
318370.78551532	4313225.72359551	110010010013007	1001	110010010013
318370.78551532	4313275.82022472	110010010013007	1001	110010010013
318370.78551532	4313325.91685393	110010010013004	1001	110010010013
318370.78551532	4313376.01348315	110010010013004	1001	110010010013
318370.78551532	4313426.11011236	110010010013004	1001	110010010013
318370.78551532	4313476.20674157	110010010015015	1001	110010010015
318370.78551532	4313526.30337079	110010010015015	1001	110010010015
318370.78551532	4313576.4	110010010015007	1001	110010010015
318420.855153203	4308917.41348315	110010008021002	802	110010008021
318420.855153203	4308967.51011236	110010008021002	802	110010008021
318420.855153203	4309017.60674157	110010008021002	802	110010008021
318420.855153203	4309067.70337079	110010008021002	802	110010008021
318420.855153203	4309117.8	110010008021005	802	110010008021
318420.855153203	4309167.89662921	110010008021005	802	110010008021
318420.855153203	4309217.99325843	110010008021005	802	110010008021
318420.855153203	4309268.08988764	110010008021005	802	110010008021
318420.855153203	4309318.18651685	110010008021005	802	110010008021
318420.855153203	4309368.28314607	110010008021005	802	110010008021
318420.855153203	4309418.37977528	110010008021005	802	110010008021
318420.855153203	4309468.47640449	110010008021002	802	110010008021
318420.855153203	4309518.57303371	110010008014000	801	110010008014
318420.855153203	4309568.66966292	110010008014000	801	110010008014
318420.855153203	4309618.76629214	110010008014000	801	110010008014
318420.855153203	4309668.86292135	110010008014000	801	110010008014
318420.855153203	4309718.95955056	110010008014014	801	110010008014
318420.855153203	4309769.05617977	110010008014014	801	110010008014
318420.855153203	4309819.15280899	110010008014002	801	110010008014
318420.855153203	4309869.2494382	110010008014002	801	110010008014
318420.855153203	4309919.34606742	110010008012011	801	110010008012
318420.855153203	4309969.44269663	110010008012011	801	110010008012
318420.855153203	4310019.53932584	110010008012011	801	110010008012
318420.855153203	4310069.63595506	110010008012011	801	110010008012
318420.855153203	4310119.73258427	110010008012011	801	110010008012
318420.855153203	4310169.82921348	110010008012011	801	110010008012
318420.855153203	4310219.9258427	110010008012011	801	110010008012
318420.855153203	4310270.02247191	110010008012008	801	110010008012
318420.855153203	4310320.11910112	110010008012008	801	110010008012
318420.855153203	4310370.21573034	110010008012008	801	110010008012
318420.855153203	4310420.31235955	110010008012008	801	110010008012
318420.855153203	4310470.40898876	110010008012008	801	110010008012
318420.855153203	4310520.50561798	110010008012008	801	110010008012
318420.855153203	4310570.60224719	110010008012005	801	110010008012
318420.855153203	4310620.6988764	110010008012007	801	110010008012
318420.855153203	4310670.79550562	110010008012002	801	110010008012
318420.855153203	4310720.89213483	110010008012002	801	110010008012
318420.855153203	4310770.98876404	110010008012002	801	110010008012
318420.855153203	4310821.08539326	110010008012002	801	110010008012
318420.855153203	4310871.18202247	110010008012000	801	110010008012
318420.855153203	4310921.27865169	110010008012000	801	110010008012
318420.855153203	4310971.3752809	110010008012000	801	110010008012
318420.855153203	4311021.47191011	110010008012000	801	110010008012
318420.855153203	4311071.56853933	110010008012000	801	110010008012
318420.855153203	4311121.66516854	110010008012000	801	110010008012
318420.855153203	4311171.76179775	110010008012000	801	110010008012
318420.855153203	4311221.85842697	110010008012001	801	110010008012
318420.855153203	4311271.95505618	110010008012001	801	110010008012
318420.855153203	4311322.05168539	110010009021000	902	110010009021
318420.855153203	4311372.14831461	110010009013029	901	110010009013
318420.855153203	4311422.24494382	110010009013029	901	110010009013
318420.855153203	4311472.34157303	110010009013027	901	110010009013
318420.855153203	4311522.43820225	110010009013027	901	110010009013
318420.855153203	4311572.53483146	110010009013026	901	110010009013
318420.855153203	4311622.63146067	110010009013026	901	110010009013
318420.855153203	4311672.72808989	110010009013026	901	110010009013
318420.855153203	4311722.8247191	110010009013011	901	110010009013
318420.855153203	4311772.92134831	110010009013011	901	110010009013
318420.855153203	4311823.01797753	110010009013011	901	110010009013
318420.855153203	4311873.11460674	110010009013011	901	110010009013
318420.855153203	4311923.21123596	110010009013011	901	110010009013
318420.855153203	4311973.30786517	110010009013011	901	110010009013
318420.855153203	4312023.40449438	110010009013019	901	110010009013
318420.855153203	4312073.5011236	110010009013019	901	110010009013
318420.855153203	4312123.59775281	110010009013019	901	110010009013
318420.855153203	4312173.69438202	110010009013017	901	110010009013
318420.855153203	4312223.79101124	110010009013017	901	110010009013
318420.855153203	4312273.88764045	110010009013016	901	110010009013
318420.855153203	4312323.98426966	110010009013016	901	110010009013
318420.855153203	4312374.08089888	110010009013006	901	110010009013
318420.855153203	4312424.17752809	110010009013006	901	110010009013
318420.855153203	4312474.2741573	110010009013005	901	110010009013
318420.855153203	4312524.37078652	110010009013005	901	110010009013
318420.855153203	4312574.46741573	110010009013001	901	110010009013
318420.855153203	4312624.56404494	110010009013001	901	110010009013
318420.855153203	4312674.66067416	110010009013000	901	110010009013
318420.855153203	4312724.75730337	110010009013000	901	110010009013
318420.855153203	4312774.85393258	110010010016006	1001	110010010016
318420.855153203	4312824.9505618	110010010016006	1001	110010010016
318420.855153203	4312875.04719101	110010010016006	1001	110010010016
318420.855153203	4312925.14382022	110010010016009	1001	110010010016
318420.855153203	4312975.24044944	110010010016009	1001	110010010016
318420.855153203	4313025.33707865	110010010016003	1001	110010010016
318420.855153203	4313075.43370786	110010010016003	1001	110010010016
318420.855153203	4313125.53033708	110010010013012	1001	110010010013
318420.855153203	4313175.62696629	110010010013012	1001	110010010013
318420.855153203	4313225.72359551	110010010013007	1001	110010010013
318420.855153203	4313275.82022472	110010010013007	1001	110010010013
318420.855153203	4313325.91685393	110010010013003	1001	110010010013
318420.855153203	4313376.01348315	110010010013003	1001	110010010013
318420.855153203	4313426.11011236	110010010013003	1001	110010010013
318420.855153203	4313476.20674157	110010010015014	1001	110010010015
318420.855153203	4313526.30337079	110010010015014	1001	110010010015
318420.855153203	4313576.4	110010010015007	1001	110010010015
318420.855153203	4313626.49662921	110010010015007	1001	110010010015
318470.924791086	4308867.31685393	110010008021002	802	110010008021
318470.924791086	4308917.41348315	110010008021002	802	110010008021
318470.924791086	4308967.51011236	110010008021002	802	110010008021
318470.924791086	4309017.60674157	110010008021002	802	110010008021
318470.924791086	4309067.70337079	110010008021005	802	110010008021
318470.924791086	4309117.8	110010008021005	802	110010008021
318470.924791086	4309167.89662921	110010008021005	802	110010008021
318470.924791086	4309217.99325843	110010008021005	802	110010008021
318470.924791086	4309268.08988764	110010008021005	802	110010008021
318470.924791086	4309318.18651685	110010008021005	802	110010008021
318470.924791086	4309368.28314607	110010008021005	802	110010008021
318470.924791086	4309418.37977528	110010008021005	802	110010008021
318470.924791086	4309468.47640449	110010008021000	802	110010008021
318470.924791086	4309518.57303371	110010008021000	802	110010008021
318470.924791086	4309568.66966292	110010008014000	801	110010008014
318470.924791086	4309618.76629214	110010008014000	801	110010008014
318470.924791086	4309668.86292135	110010008014000	801	110010008014
318470.924791086	4309718.95955056	110010008014000	801	110010008014
318470.924791086	4309769.05617977	110010008014000	801	110010008014
318470.924791086	4309819.15280899	110010008014000	801	110010008014
318470.924791086	4309869.2494382	110010008014000	801	110010008014
318470.924791086	4309919.34606742	110010008012010	801	110010008012
318470.924791086	4309969.44269663	110010008012010	801	110010008012
318470.924791086	4310019.53932584	110010008012008	801	110010008012
318470.924791086	4310069.63595506	110010008012008	801	110010008012
318470.924791086	4310119.73258427	110010008012008	801	110010008012
318470.924791086	4310169.82921348	110010008012008	801	110010008012
318470.924791086	4310219.9258427	110010008012008	801	110010008012
318470.924791086	4310270.02247191	110010008012008	801	110010008012
318470.924791086	4310320.11910112	110010008012009	801	110010008012
318470.924791086	4310370.21573034	110010008012009	801	110010008012
318470.924791086	4310420.31235955	110010008012008	801	110010008012
318470.924791086	4310470.40898876	110010008012008	801	110010008012
318470.924791086	4310520.50561798	110010008012005	801	110010008012
318470.924791086	4310570.60224719	110010008012005	801	110010008012
318470.924791086	4310620.6988764	110010008012005	801	110010008012
318470.924791086	4310720.89213483	110010008012003	801	110010008012
318470.924791086	4310770.98876404	110010008012002	801	110010008012
318470.924791086	4310821.08539326	110010008012002	801	110010008012
318470.924791086	4310871.18202247	110010008012002	801	110010008012
318470.924791086	4310921.27865169	110010008012000	801	110010008012
318470.924791086	4310971.3752809	110010008012000	801	110010008012
318470.924791086	4311021.47191011	110010008012000	801	110010008012
318470.924791086	4311071.56853933	110010008012000	801	110010008012
318470.924791086	4311121.66516854	110010008012000	801	110010008012
318470.924791086	4311171.76179775	110010008012000	801	110010008012
318470.924791086	4311221.85842697	110010008012000	801	110010008012
318470.924791086	4311271.95505618	110010008012001	801	110010008012
318470.924791086	4311322.05168539	110010009021000	902	110010009021
318470.924791086	4311372.14831461	110010009013029	901	110010009013
318470.924791086	4311422.24494382	110010009013029	901	110010009013
318470.924791086	4311472.34157303	110010009013026	901	110010009013
318470.924791086	4311522.43820225	110010009013026	901	110010009013
318470.924791086	4311572.53483146	110010009013026	901	110010009013
318470.924791086	4311622.63146067	110010009013026	901	110010009013
318470.924791086	4311672.72808989	110010009013026	901	110010009013
318470.924791086	4311722.8247191	110010009013011	901	110010009013
318470.924791086	4311772.92134831	110010009013011	901	110010009013
318470.924791086	4311823.01797753	110010009013011	901	110010009013
318470.924791086	4311873.11460674	110010009013011	901	110010009013
318470.924791086	4311923.21123596	110010009013011	901	110010009013
318470.924791086	4311973.30786517	110010009013011	901	110010009013
318470.924791086	4312023.40449438	110010009013019	901	110010009013
318470.924791086	4312073.5011236	110010009013019	901	110010009013
318470.924791086	4312123.59775281	110010009013019	901	110010009013
318470.924791086	4312173.69438202	110010009013017	901	110010009013
318470.924791086	4312223.79101124	110010009013017	901	110010009013
318470.924791086	4312273.88764045	110010009013016	901	110010009013
318470.924791086	4312323.98426966	110010009013016	901	110010009013
318470.924791086	4312374.08089888	110010009013006	901	110010009013
318470.924791086	4312424.17752809	110010009013006	901	110010009013
318470.924791086	4312474.2741573	110010009013005	901	110010009013
318470.924791086	4312524.37078652	110010009013005	901	110010009013
318470.924791086	4312574.46741573	110010009013001	901	110010009013
318470.924791086	4312624.56404494	110010009013001	901	110010009013
318470.924791086	4312674.66067416	110010009013001	901	110010009013
318470.924791086	4312724.75730337	110010010016006	1001	110010010016
318470.924791086	4312774.85393258	110010010016006	1001	110010010016
318470.924791086	4312824.9505618	110010010016006	1001	110010010016
318470.924791086	4312875.04719101	110010010016006	1001	110010010016
318470.924791086	4312925.14382022	110010010016009	1001	110010010016
318470.924791086	4312975.24044944	110010010016009	1001	110010010016
318470.924791086	4313025.33707865	110010010016003	1001	110010010016
318470.924791086	4313075.43370786	110010010016003	1001	110010010016
318470.924791086	4313125.53033708	110010010013012	1001	110010010013
318470.924791086	4313175.62696629	110010010013012	1001	110010010013
318470.924791086	4313225.72359551	110010010013007	1001	110010010013
318470.924791086	4313275.82022472	110010010013007	1001	110010010013
318470.924791086	4313325.91685393	110010010013003	1001	110010010013
318470.924791086	4313376.01348315	110010010013003	1001	110010010013
318470.924791086	4313426.11011236	110010010013003	1001	110010010013
318470.924791086	4313476.20674157	110010010015014	1001	110010010015
318470.924791086	4313526.30337079	110010010015014	1001	110010010015
318470.924791086	4313576.4	110010010015007	1001	110010010015
318470.924791086	4313626.49662921	110010010015007	1001	110010010015
318470.924791086	4313676.59325843	110010010015007	1001	110010010015
318520.994428969	4308817.22022472	110010008021002	802	110010008021
318520.994428969	4308867.31685393	110010008021002	802	110010008021
318520.994428969	4308917.41348315	110010008021002	802	110010008021
318520.994428969	4308967.51011236	110010008021002	802	110010008021
318520.994428969	4309017.60674157	110010008021002	802	110010008021
318520.994428969	4309067.70337079	110010008021002	802	110010008021
318520.994428969	4309117.8	110010008021005	802	110010008021
318520.994428969	4309167.89662921	110010008021005	802	110010008021
318520.994428969	4309217.99325843	110010008021005	802	110010008021
318520.994428969	4309268.08988764	110010008021005	802	110010008021
318520.994428969	4309318.18651685	110010008021005	802	110010008021
318520.994428969	4309368.28314607	110010008021005	802	110010008021
318520.994428969	4309418.37977528	110010008021002	802	110010008021
318520.994428969	4309468.47640449	110010008021000	802	110010008021
318520.994428969	4309518.57303371	110010008021000	802	110010008021
318520.994428969	4309568.66966292	110010008014000	801	110010008014
318520.994428969	4309618.76629214	110010008014000	801	110010008014
318520.994428969	4309668.86292135	110010008014000	801	110010008014
318520.994428969	4309718.95955056	110010008014000	801	110010008014
318520.994428969	4309769.05617977	110010008014001	801	110010008014
318520.994428969	4309819.15280899	110010008014001	801	110010008014
318520.994428969	4309869.2494382	110010008014000	801	110010008014
318520.994428969	4309919.34606742	110010008012010	801	110010008012
318520.994428969	4309969.44269663	110010008012010	801	110010008012
318520.994428969	4310019.53932584	110010008012008	801	110010008012
318520.994428969	4310069.63595506	110010008012008	801	110010008012
318520.994428969	4310119.73258427	110010008012008	801	110010008012
318520.994428969	4310169.82921348	110010008012012	801	110010008012
318520.994428969	4310219.9258427	110010008012012	801	110010008012
318520.994428969	4310270.02247191	110010008012008	801	110010008012
318520.994428969	4310320.11910112	110010008012008	801	110010008012
318520.994428969	4310370.21573034	110010008012008	801	110010008012
318520.994428969	4310420.31235955	110010008012008	801	110010008012
318520.994428969	4310470.40898876	110010008012008	801	110010008012
318520.994428969	4310520.50561798	110010008012005	801	110010008012
318520.994428969	4310570.60224719	110010008012005	801	110010008012
318520.994428969	4310620.6988764	110010008012005	801	110010008012
318520.994428969	4310720.89213483	110010008012003	801	110010008012
318520.994428969	4310770.98876404	110010008012003	801	110010008012
318520.994428969	4310821.08539326	110010008012003	801	110010008012
318520.994428969	4310871.18202247	110010008012002	801	110010008012
318520.994428969	4310921.27865169	110010008012002	801	110010008012
318520.994428969	4310971.3752809	110010008012000	801	110010008012
318520.994428969	4311021.47191011	110010008012000	801	110010008012
318520.994428969	4311071.56853933	110010008012000	801	110010008012
318520.994428969	4311121.66516854	110010008012000	801	110010008012
318520.994428969	4311171.76179775	110010008012000	801	110010008012
318520.994428969	4311221.85842697	110010008012000	801	110010008012
318520.994428969	4311271.95505618	110010008012000	801	110010008012
318520.994428969	4311322.05168539	110010008012001	801	110010008012
318520.994428969	4311372.14831461	110010009021000	902	110010009021
318520.994428969	4311422.24494382	110010009013030	901	110010009013
318520.994428969	4311472.34157303	110010009013030	901	110010009013
318520.994428969	4311522.43820225	110010009013026	901	110010009013
318520.994428969	4311572.53483146	110010009013011	901	110010009013
318520.994428969	4311622.63146067	110010009013011	901	110010009013
318520.994428969	4311672.72808989	110010009013011	901	110010009013
318520.994428969	4311722.8247191	110010009013011	901	110010009013
318520.994428969	4311772.92134831	110010009013011	901	110010009013
318520.994428969	4311823.01797753	110010009013011	901	110010009013
318520.994428969	4311873.11460674	110010009013011	901	110010009013
318520.994428969	4311923.21123596	110010009013011	901	110010009013
318520.994428969	4311973.30786517	110010009013011	901	110010009013
318520.994428969	4312023.40449438	110010009013012	901	110010009013
318520.994428969	4312073.5011236	110010009013012	901	110010009013
318520.994428969	4312123.59775281	110010009013012	901	110010009013
318520.994428969	4312173.69438202	110010009013018	901	110010009013
318520.994428969	4312223.79101124	110010009013018	901	110010009013
318520.994428969	4312273.88764045	110010009013015	901	110010009013
318520.994428969	4312323.98426966	110010009013015	901	110010009013
318520.994428969	4312374.08089888	110010009013007	901	110010009013
318520.994428969	4312424.17752809	110010009013007	901	110010009013
318520.994428969	4312474.2741573	110010009013004	901	110010009013
318520.994428969	4312524.37078652	110010009013004	901	110010009013
318520.994428969	4312574.46741573	110010009013001	901	110010009013
318520.994428969	4312624.56404494	110010009013001	901	110010009013
318520.994428969	4312674.66067416	110010010016018	1001	110010010016
318520.994428969	4312724.75730337	110010010016018	1001	110010010016
318520.994428969	4312774.85393258	110010010016019	1001	110010010016
318520.994428969	4312824.9505618	110010010016007	1001	110010010016
318520.994428969	4312875.04719101	110010010016007	1001	110010010016
318520.994428969	4312925.14382022	110010010016008	1001	110010010016
318520.994428969	4312975.24044944	110010010016008	1001	110010010016
318520.994428969	4313025.33707865	110010010016002	1001	110010010016
318520.994428969	4313075.43370786	110010010016002	1001	110010010016
318520.994428969	4313125.53033708	110010010013014	1001	110010010013
318520.994428969	4313175.62696629	110010010013014	1001	110010010013
318520.994428969	4313225.72359551	110010010013008	1001	110010010013
318520.994428969	4313275.82022472	110010010013008	1001	110010010013
318520.994428969	4313325.91685393	110010010013002	1001	110010010013
318520.994428969	4313376.01348315	110010010013002	1001	110010010013
318520.994428969	4313426.11011236	110010010013002	1001	110010010013
318520.994428969	4313476.20674157	110010010015013	1001	110010010015
318520.994428969	4313526.30337079	110010010015013	1001	110010010015
318520.994428969	4313576.4	110010010015008	1001	110010010015
318520.994428969	4313626.49662921	110010010015008	1001	110010010015
318520.994428969	4313676.59325843	110010010015008	1001	110010010015
318571.064066852	4308767.12359551	110010008021002	802	110010008021
318571.064066852	4308817.22022472	110010008021002	802	110010008021
318571.064066852	4308867.31685393	110010008021002	802	110010008021
318571.064066852	4308917.41348315	110010008021002	802	110010008021
318571.064066852	4308967.51011236	110010008021002	802	110010008021
318571.064066852	4309017.60674157	110010008021002	802	110010008021
318571.064066852	4309067.70337079	110010008021002	802	110010008021
318571.064066852	4309117.8	110010008021002	802	110010008021
318571.064066852	4309167.89662921	110010008021005	802	110010008021
318571.064066852	4309217.99325843	110010008021005	802	110010008021
318571.064066852	4309268.08988764	110010008021005	802	110010008021
318571.064066852	4309318.18651685	110010008021002	802	110010008021
318571.064066852	4309368.28314607	110010008021001	802	110010008021
318571.064066852	4309418.37977528	110010008021000	802	110010008021
318571.064066852	4309468.47640449	110010008021000	802	110010008021
318571.064066852	4309518.57303371	110010008021000	802	110010008021
318571.064066852	4309568.66966292	110010008014000	801	110010008014
318571.064066852	4309618.76629214	110010008014000	801	110010008014
318571.064066852	4309668.86292135	110010008014000	801	110010008014
318571.064066852	4309718.95955056	110010008014000	801	110010008014
318571.064066852	4309769.05617977	110010008014000	801	110010008014
318571.064066852	4309819.15280899	110010008014000	801	110010008014
318571.064066852	4309869.2494382	110010008014000	801	110010008014
318571.064066852	4309919.34606742	110010008012010	801	110010008012
318571.064066852	4309969.44269663	110010008012010	801	110010008012
318571.064066852	4310019.53932584	110010008012008	801	110010008012
318571.064066852	4310069.63595506	110010008012008	801	110010008012
318571.064066852	4310119.73258427	110010008012008	801	110010008012
318571.064066852	4310169.82921348	110010008012008	801	110010008012
318571.064066852	4310219.9258427	110010008012008	801	110010008012
318571.064066852	4310270.02247191	110010008012008	801	110010008012
318571.064066852	4310320.11910112	110010008012008	801	110010008012
318571.064066852	4310370.21573034	110010008012008	801	110010008012
318571.064066852	4310420.31235955	110010008012008	801	110010008012
318571.064066852	4310470.40898876	110010008012013	801	110010008012
318571.064066852	4310520.50561798	110010008012013	801	110010008012
318571.064066852	4310570.60224719	110010008012005	801	110010008012
318571.064066852	4310620.6988764	110010008012005	801	110010008012
318571.064066852	4310720.89213483	110010008012003	801	110010008012
318571.064066852	4310770.98876404	110010008012003	801	110010008012
318571.064066852	4310821.08539326	110010008012003	801	110010008012
318571.064066852	4310871.18202247	110010008012002	801	110010008012
318571.064066852	4310921.27865169	110010008012002	801	110010008012
318571.064066852	4310971.3752809	110010008012000	801	110010008012
318571.064066852	4311021.47191011	110010008012000	801	110010008012
318571.064066852	4311071.56853933	110010008012000	801	110010008012
318571.064066852	4311121.66516854	110010008012000	801	110010008012
318571.064066852	4311171.76179775	110010008012000	801	110010008012
318571.064066852	4311221.85842697	110010008012000	801	110010008012
318571.064066852	4311271.95505618	110010008012000	801	110010008012
318571.064066852	4311322.05168539	110010008012001	801	110010008012
318571.064066852	4311372.14831461	110010008012001	801	110010008012
318571.064066852	4311422.24494382	110010009013030	901	110010009013
318571.064066852	4311472.34157303	110010009013030	901	110010009013
318571.064066852	4311522.43820225	110010009013011	901	110010009013
318571.064066852	4311572.53483146	110010009013011	901	110010009013
318571.064066852	4311622.63146067	110010009013011	901	110010009013
318571.064066852	4311672.72808989	110010009013011	901	110010009013
318571.064066852	4311722.8247191	110010009013011	901	110010009013
318571.064066852	4311772.92134831	110010009013011	901	110010009013
318571.064066852	4311823.01797753	110010009013011	901	110010009013
318571.064066852	4311873.11460674	110010009013011	901	110010009013
318571.064066852	4311923.21123596	110010009013011	901	110010009013
318571.064066852	4311973.30786517	110010009013012	901	110010009013
318571.064066852	4312023.40449438	110010009013012	901	110010009013
318571.064066852	4312073.5011236	110010009013012	901	110010009013
318571.064066852	4312123.59775281	110010009013012	901	110010009013
318571.064066852	4312173.69438202	110010009013018	901	110010009013
318571.064066852	4312223.79101124	110010009013018	901	110010009013
318571.064066852	4312273.88764045	110010009013015	901	110010009013
318571.064066852	4312323.98426966	110010009013015	901	110010009013
318571.064066852	4312374.08089888	110010009013007	901	110010009013
318571.064066852	4312424.17752809	110010009013007	901	110010009013
318571.064066852	4312474.2741573	110010009013004	901	110010009013
318571.064066852	4312524.37078652	110010009013004	901	110010009013
318571.064066852	4312574.46741573	110010009013001	901	110010009013
318571.064066852	4312624.56404494	110010010016018	1001	110010010016
318571.064066852	4312674.66067416	110010010016018	1001	110010010016
318571.064066852	4312724.75730337	110010010016018	1001	110010010016
318571.064066852	4312774.85393258	110010010016019	1001	110010010016
318571.064066852	4312824.9505618	110010010016007	1001	110010010016
318571.064066852	4312875.04719101	110010010016007	1001	110010010016
318571.064066852	4312925.14382022	110010010016008	1001	110010010016
318571.064066852	4312975.24044944	110010010016008	1001	110010010016
318571.064066852	4313025.33707865	110010010016002	1001	110010010016
318571.064066852	4313075.43370786	110010010016002	1001	110010010016
318571.064066852	4313125.53033708	110010010013014	1001	110010010013
318571.064066852	4313175.62696629	110010010013014	1001	110010010013
318571.064066852	4313225.72359551	110010010013008	1001	110010010013
318571.064066852	4313275.82022472	110010010013008	1001	110010010013
318571.064066852	4313325.91685393	110010010013002	1001	110010010013
318571.064066852	4313376.01348315	110010010013002	1001	110010010013
318571.064066852	4313426.11011236	110010010013002	1001	110010010013
318571.064066852	4313476.20674157	110010010015013	1001	110010010015
318571.064066852	4313526.30337079	110010010015013	1001	110010010015
318571.064066852	4313576.4	110010010015008	1001	110010010015
318571.064066852	4313626.49662921	110010010015008	1001	110010010015
318571.064066852	4313676.59325843	110010010015008	1001	110010010015
318571.064066852	4313726.68988764	110010010015004	1001	110010010015
318571.064066852	4313776.78651685	110010010015004	1001	110010010015
318621.133704735	4308717.02696629	110010008021002	802	110010008021
318621.133704735	4308767.12359551	110010008021002	802	110010008021
318621.133704735	4308817.22022472	110010008021002	802	110010008021
318621.133704735	4308867.31685393	110010008021002	802	110010008021
318621.133704735	4308917.41348315	110010008021002	802	110010008021
318621.133704735	4308967.51011236	110010008021002	802	110010008021
318621.133704735	4309017.60674157	110010008021002	802	110010008021
318621.133704735	4309067.70337079	110010008021002	802	110010008021
318621.133704735	4309117.8	110010008021002	802	110010008021
318621.133704735	4309167.89662921	110010008021002	802	110010008021
318621.133704735	4309217.99325843	110010008021005	802	110010008021
318621.133704735	4309268.08988764	110010008021002	802	110010008021
318621.133704735	4309318.18651685	110010008021001	802	110010008021
[truncated: 53,637 more rows]
